# Supplementary material for: Uptake of four or more doses of sulfadoxine pyrimethamine for intermittent preventive treatment of malaria during pregnancy in Zambia: findings from the 2018 malaria in pregnancy survey
Source: PubMed Central journal article supplement — BMJ Open. 2023 May 26;13(5):e073287. doi: 10.1136/bmjopen-2023-073287 (PMC10231002; doi:10.1136/bmjopen-2023-073287), 2023-05-26
Supplement: bmjopen-2023-073287.draft_revisions.pdf [file bmjopen-2023-073287.draft_revisions.pdf]

# BMJ Open

BMJ Open is committed to open peer review. As part of this commitment we make the peer review history of every article we publish publicly available.

When an article is published we post the peer reviewers' comments and the authors' responses online. We also post the versions of the paper that were used during peer review. These are the versions that the peer review comments apply to.

The versions of the paper that follow are the versions that were submitted during the peer review process. They are not the versions of record or the final published versions. They should not be cited or distributed as the published version of this manuscript.

BMJ Open is an open access journal and the full, final, typeset and author-corrected version of record of the manuscript is available on our site with no access controls, subscription charges or pay-per-view fees (<http://bmjopen.bmj.com>).

If you have any questions on BMJ Open's open peer review process please email [info.bmjopen@bmj.com](mailto:info.bmjopen@bmj.com)

# BMJ Open

## Uptake of Four or More Doses of Sulfadoxine Pyrimethamine for Intermittent Preventive Treatment of Malaria during Pregnancy in Zambia: Findings from the 2018 Malaria in Pregnancy Survey

|                               |                                                                                                                                                                                                                                                                                                                                                                                                                                                                                                                                                                                                                             |
|-------------------------------|-----------------------------------------------------------------------------------------------------------------------------------------------------------------------------------------------------------------------------------------------------------------------------------------------------------------------------------------------------------------------------------------------------------------------------------------------------------------------------------------------------------------------------------------------------------------------------------------------------------------------------|
| Journal:                      | <i>BMJ Open</i>                                                                                                                                                                                                                                                                                                                                                                                                                                                                                                                                                                                                             |
| Manuscript ID                 | bmjopen-2023-073287                                                                                                                                                                                                                                                                                                                                                                                                                                                                                                                                                                                                         |
| Article Type:                 | Original research                                                                                                                                                                                                                                                                                                                                                                                                                                                                                                                                                                                                           |
| Date Submitted by the Author: | 01-Mar-2023                                                                                                                                                                                                                                                                                                                                                                                                                                                                                                                                                                                                                 |
| Complete List of Authors:     | Sinyange, Danny; Levy Mwanawasa Medical University, School of Public Health; Zambia National Public Health Institute, Zambia Field Epidemiology Training Program<br>Sialubanje, Cephas; Levy Mwanawasa Medical University, School of Public Health<br>Mutale, Lwito; Zambia National Public Health Institute, Zambia Field Epidemiology Training Program<br>Mumbole, Hudson; Zambia Ministry of Health, ZAMBART<br>Hamainza, Busiku ; Zambia Ministry of Health, National Malaria Elimination Centre<br>Mukumbuta, Nawa; Levy Mwanawasa Medical University, School of Public Health; Stellenbosch University, Public Health |
| Keywords:                     | EPIDEMIOLOGY, Health Services Accessibility, PUBLIC HEALTH, Maternal medicine < OBSTETRICS                                                                                                                                                                                                                                                                                                                                                                                                                                                                                                                                  |
|                               |                                                                                                                                                                                                                                                                                                                                                                                                                                                                                                                                                                                                                             |

SCHOLARONE™  
Manuscripts

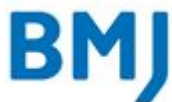

I, the Submitting Author has the right to grant and does grant on behalf of all authors of the Work (as defined in the below author licence), an exclusive licence and/or a non-exclusive licence for contributions from authors who are: i) UK Crown employees; ii) where BMJ has agreed a CC-BY licence shall apply, and/or iii) in accordance with the terms applicable for US Federal Government officers or employees acting as part of their official duties; on a worldwide, perpetual, irrevocable, royalty-free basis to BMJ Publishing Group Ltd ("BMJ") its licensees and where the relevant Journal is co-owned by BMJ to the co-owners of the Journal, to publish the Work in this journal and any other BMJ products and to exploit all rights, as set out in our [licence](#).

The Submitting Author accepts and understands that any supply made under these terms is made by BMJ to the Submitting Author unless you are acting as an employee on behalf of your employer or a postgraduate student of an affiliated institution which is paying any applicable article publishing charge ("APC") for Open Access articles. Where the Submitting Author wishes to make the Work available on an Open Access basis (and intends to pay the relevant APC), the terms of reuse of such Open Access shall be governed by a Creative Commons licence – details of these licences and which [Creative Commons](#) licence will apply to this Work are set out in our licence referred to above.

Other than as permitted in any relevant BMJ Author's Self Archiving Policies, I confirm this Work has not been accepted for publication elsewhere, is not being considered for publication elsewhere and does not duplicate material already published. I confirm all authors consent to publication of this Work and authorise the granting of this licence.

1  
2  
3 **Uptake of Four or More Doses of Sulfadoxine Pyrimethamine for Intermittent Preventive**  
4 **Treatment of Malaria during Pregnancy in Zambia: Findings from the 2018 Malaria in Pregnancy**  
5 **Survey**  
6  
7  
8  
9

10  
11 Danny Sinyange<sup>1,2</sup>, Cephas Sialubanje<sup>1</sup>, Lwito Salifya Mutale<sup>2</sup>, Hudson Mumbole<sup>4</sup>, Busiku Hamainza<sup>4</sup>,  
12 Nawa Mukumbuta<sup>1</sup>  
13  
14  
15

16  
17  
18 **Affiliations**  
19

- 20 1. School of Public Health, Levy Mwanawasa Medical University, Lusaka, Zambia  
21  
22 2. Zambia National Public Health Institute, Zambia Field Epidemiology Training Program, Lusaka,  
23 Zambia  
24  
25 3. ZAMBART, Ministry of Health, Lusaka, Zambia  
26  
27 4. Ministry of Health, National Malaria Elimination Centre, Lusaka, Zambia  
28  
29  
30  
31  
32

33 **Corresponding author:** Sialubanje Cephas  
34

35 Email: csialubanje@yahoo.com  
36  
37  
38  
39  
40  
41  
42  
43  
44  
45  
46  
47  
48  
49  
50  
51  
52  
53  
54  
55  
56  
57  
58  
59  
60

**Abstract**

1  
2  
3 **Introduction:** The Zambian government is implementing the malaria in pregnancy (MiP) policy which  
4 includes intermittent preventive treatment of malaria during pregnancy with sulfadoxine pyrimethamine  
5 (IPTp-SP). However, the latest (2018) malaria indicator surveys (MIS) showed very low uptake of four  
6 doses of IPTp-SP at 5%. This study aimed to determine the prevalence and predictors of the uptake of  
7 four or more doses of IPTp-SP in Zambia.  
8  
9

10  
11  
12 **Methods:** We conducted a secondary analysis of the 2018 MIS dataset. Descriptive statistical analysis  
13 was carried out to summarise participant characteristics and IPTp-SP uptake. Univariate logistic  
14 regression was carried out to determine association between the explanatory and outcome variables.  
15 Explanatory variables with a p-value less than 0.20 on univariate analysis were included in the  
16 multivariable logistic regression model and crude and adjusted odds ratios along with their 95% CIs, p-  
17 value <0.05 were computed.  
18  
19  
20  
21  
22

23 **Results:** Of the total sample of 1,163, only 7.5% of participants received IPTp-SP 4+. The province of  
24 residence and wealth quintile were significantly associated with uptake of IPTp-SP doses; participants  
25 from Luapula (aOR=8.72, 95%CI [1.72–44.26, p=0.009]) and Muchinga (aOR=6.67, 95%CI  
26 [1.19–37.47, p=0.031]) provinces were significantly more likely to receive IPTp-SP 4+ compared to those  
27 from the Copperbelt province. Conversely, women in the highest wealth quintile were significantly less  
28 likely to receive IPTp-SP 4+ doses compared to those in the lowest quintile (aOR=0.32; 95%CI  
29 [0.13–0.79, p=0.014])  
30  
31  
32  
33  
34  
35  
36  
37  
38

39 **Conclusion:** These findings confirm a low uptake of four or more doses of IPTp-SP in the country.  
40 Women in urban provinces with low malaria burden and high wealth quintile are less likely to receive  
41 adequate doses compared to rural counterparts in low wealth quintile. Strategies are needed to target  
42 women in urban provinces to ensure adherence to the IPTp-SP guidelines.  
43  
44  
45  
46  
47

48 **Word count: 285**

49 **Key words:** Malaria in Pregnancy, Intermittent Preventive Treatment, Uptake, Policy, Zambia.  
50  
51  
52  
53  
54  
55  
56  
57  
58  
59  
60

### Strengths and weakness

- Use of the large dataset 2018 malaria in pregnancy data which covered all the 10 provinces of Zambia reduces makes the findings representative of the whole country.
- Use of multi-stage random sampling technique reduced selection bias and increased validity of the findings
- Inclusion into analysis only women of reproductive age who gave birth after the new IPTp-SP policy was introduced reduced information bias and increased internal validity of the study
- Use of secondary data limited the choice of variables to be included in the analysis
- Exclusion of participants with incomplete data could have reduced the power of the study

## Introduction

Malaria is a parasitic disease caused by a protozoan of genus *Plasmodium*. The five main species of the parasite are *Plasmodium falciparum*, *P. malariae*, *P. ovale*, *P. vivax* and *P. knowlesi*. It is widespread in tropical and sub-tropical regions (1). Among the *Plasmodium* species, *Plasmodium falciparum* is the leading cause of maternal and neonatal illness and death due to malaria, especially in Africa (2). Malaria infection during pregnancy (MiP) can lead to miscarriage, premature delivery, low birth weight, congenital infection, and/or perinatal death (3,4).

Estimates show that 50 million women living in malaria-endemic countries around the world become pregnant each year, and more than 50% of these live in tropical areas of Africa where there is a high transmission of *P. falciparum* (5,6). In sub-Saharan Africa, malaria is estimated to affect between 350 to 500 million people annually and accounts for 1 to 3 million deaths, 10,000 maternal and 200,000 neonatal deaths per year and one in four women have evidence of placental infection at the time of delivery (7–9). In Zambia, approximately 5.2 million malaria cases are reported per year with 98% of cases caused by *P. falciparum*. An estimated 200,000 pregnancies in Zambia are at risk of malaria each year (10).

Zambia National Malaria Elimination Centre (NMEC) in line with WHO strategic framework of malaria prevention and control during pregnancy has developed and is implementing a well-defined malaria in pregnancy (MiP) policy which includes the provision of free intermittent preventive treatment of malaria during pregnancy with sulfadoxine pyrimethamine (IPTp-SP), insecticide treated nets (ITNs) and prompt diagnosis and complete treatment of malaria (11). This malaria control package is implemented as part of antenatal care (ANC) (12). ANC provides a good platform for regular and close contact between pregnant women and skilled health personnel for improved service delivery and pregnancy monitoring. Zambia follows the 2016 WHO ANC model which recommends a minimum of 8 ANC contacts with the first contact scheduled to take place in the first trimester, two contacts in the second trimester and five contacts scheduled in the third trimester (12)

Administration of IPTp-SP is based on the assumption that every pregnant woman living in an area with high malaria transmission has malaria parasites. The parasites live in her blood or placenta, whether or not she has symptoms and signs of malaria (13). Recent findings with regards to placental malaria, characterized by the accumulation of *Plasmodium*-infected red blood cells in the placental intervillous space shows that it leads to adverse perinatal outcomes such as stillbirth, low birth weight, preterm birth, and small-for-gestational-age neonates (14). Further, low birth weight is highly associated with a marked increase in infant mortality (15,16). Results from more studies reviewed effects of malaria in pregnancy

1  
2  
3 on child growth such as high rates of cognitive impairment, learning disability, and behavioural problems  
4 among children who were born with lower birth weight (17,18).  
5  
6

7 In Zambia, administration of two or more doses of IPTp-SP showed a decrease of low birthweight among  
8 paucigravid and multigravid women in Mansa district of Luapula province compared to one or less doses  
9 (19). In another study conducted in Mali, an addition of a third dose of IPTp-SP showed a halved risk of  
10 placental malaria, low birth weight and preterm births in all gravidae, compared with the standard two  
11 dose regimen (20). Based on the evidence from the two cited studies, the higher doses of IPTp-SP  
12 suggest to give better pregnancy outcomes than lower doses.  
13  
14  
15  
16

17 IPTp-SP involves administration of sulfadoxine pyrimethamine (SP) (comprising three tablets containing  
18 500 mg/25 mg SP, giving the total required dosage of 1500 mg/75 mg SP) as direct observed therapy  
19 (DOT) to pregnant women. The first IPTp-SP dose is administered during the second trimester, 13-16  
20 gestation weeks, followed by monthly doses until delivery for at least four doses.  
21  
22  
23  
24  
25

26 In 2016, Zambia adopted the national malaria elimination strategy which includes uptake of four or more  
27 IPTp-SP doses (10). However, reports in the country have shown that the proportion of women receiving  
28 four or more doses of doses of IPTp-SP is low. The 2015 and 2018 malaria indicator survey (MIS)  
29 showed that only 5% of pregnant women took four or more doses of IPTp-SP (21). The reasons for the  
30 low coverage of IPTp-SP are not clear. Limited studies have been conducted on the predictors of the  
31 uptake of four or more doses of SP in Zambia Information.  
32  
33  
34  
35  
36

### 37 **Objectives**

38  
39 The aim of this study was to determine the prevalence and predictors of the uptake of four or more doses  
40 of IPTp-SP in Zambia. Information is required to inform policy and programming to improve uptake of  
41 SP in the country.  
42  
43  
44  
45  
46

### 47 **Methods**

#### 48 **Study design**

49  
50 The present study is a secondary analysis of the 2018 Malaria indicator survey done in Zambia. It was a  
51 cross section survey conducted from April to May, 2018. The survey is periodically done to assess the  
52 malaria burden and coverages of key malaria interventions such as vector control, parasite clearance,  
53 health promotion, enhanced surveillance, monitoring, evaluation and research, health system capacity,  
54 financing and case management in the general population including MiP. The MIS 2018 was the latest  
55  
56  
57  
58  
59  
60



comprehensive dataset that was representative of the whole country and readily accessible at the time of writing the manuscript.

### **Study site**

The study used the 2018 MIS survey data which covered all the ten provinces of Zambia, making it nationally representative. The country is divided into ten provinces that are further divided into districts. For statistical purposes, each district is subdivided into census supervisory areas (CSAs) which are in turn subdivided into enumeration areas (EAs). The listing of EAs has information on the number of households and the populations.

Zambia is a sub-Saharan African country located in south-central Africa with a surface area of 752,614 square kilometres. Lusaka, the capital city, is located in the south-central part of the country. The topography is characterised by a high plateau, river valleys, and water bodies. The country derives its name from the Zambezi river, which drains all but a small northern part of the country (22). Zambia's population as of 8th September 2022 was 19,610,769. The male population was 9,603,056 and the female population was 10,007,713 (23). It has a tropical climate with the rainy season occurring during October to April. The climate is suitable for mosquito breeding and malaria transmission takes place throughout the year but peaks during the rainy season (24).

### **Study participants and procedures**

Study participants were women of reproductive age who participated in the 2018 MIS. The country conducts MIS surveys every two to three years to provide updates on malaria interventions and disease burden in the country. A total of 3,686 women of reproductive age who gave birth in the past five years participated in the 2018 MIS. From this sample, a total of 1,381 were included in our analysis.

### **Inclusion criteria.**

To be included in the study, participants needed to be:

- Pregnant women who were pregnant in the past two years and five months after the new 2016 policy on the fourth dose IPTp-SP was implemented
- All women aged between 15 to 49 years from all the ten provinces

Women who did not give consent and those who did not complete the individual questionnaires were not included in the analysis.

### **Sample size estimation**

The study participants in the main survey were selected using a two-stage cluster sampling technique which are based on a nationally representative sample of 4,177 households from 179 standard enumeration areas (SEAs) randomly selected from all ten provinces. Based on these criteria, at least 2,176 households were required in the rural domain. For further details on the 2018 MIS sampling technique and sample size determination see the 2018 MIS published report by the Zambian ministry of health.

#### **Assumptions for the sample size determination were;**

- 95% confidence interval
- 80% power
- design effect of 2.50
- Z-score of 1.96
- 10% relative standard error
- Margin of error of 2%
- 20% adjustment for non-response

**The estimated minimum sample size in this study was determined by the formula below;**

$$n = \frac{z^2 \times p(1-p)(DEFF)}{d^2} = 1141 \quad (25)$$

Where: n is the calculated sample size, z =1.96 is the statistic that defines the level of confidence required, p=0.05 is a prevalence of uptake of IPTp-SP among pregnant women in Zambia, expressed as a proportion of that population

D=0.02 is the desired level of precision, DEFF=2.5 is the design effect (25).

#### **Variables**

The variables for the study were as follows:

- Outcome variable: uptake of four or more doses of IPTp-SP
- Predictor variables: sociodemographic variables (age, parity, place and province of residence, religion, educational level, wealth index)
- Basic knowledge about malaria
- Knowledge about malaria treatment

1  
2  
3 The predictor variables were selected based on thorough literature review. In this study uptake means  
4 receiving any dosage of SP during pregnancy, with each dose being given at least 1 month apart starting  
5 from the second trimester of gestation, until the time of delivery as directly observed therapy.  
6  
7  
8  
9

## 10 11 **Data sources and processing**

12  
13 The merged 2018 MIS dataset comprising women of reproductive age (15 to 49 years) was extracted  
14 into the Microsoft office excel sheet 2013 using the data extraction tool. We subset women 15 to 49 years  
15 of age who were eligible to complete the questionnaire. From the eligible women, we subsetted women  
16 who consented. Further, a subset of women who completed the questionnaire and delivered in 2016 or  
17 later (after the new IPTp policy) was done using the lubridate library in R Studio. This was determined by  
18 using the age of the youngest child (that is, if a child was less than 881 days).  
19  
20  
21  
22  
23  
24  
25

## 26 **Statistical analysis**

27  
28 Descriptive statistical analysis was carried out first on socio-demographics to obtain frequencies and  
29 proportions. The proportion of missing values on the outcome was calculated. The correlation among the  
30 predictor variables was explored. Thereafter, univariate logistic regression was carried out and  
31 explanatory variables whose p-values were less than 0.2 were presented in table 2. The estimators with  
32 a p-value level of 0.20 chose the adjusted estimate more frequently when confounding is present and so  
33 produced less bias than the estimators with a p-value level of 0.05 (26).  
34  
35  
36  
37  
38  
39

40 Then, a backward selection approach using stepwise method with a p-value of 0.2 threshold was used  
41 to select explanatory variables to be included in the multivariable logistic regression for further analysis  
42 of the association to obtain adjusted odds ratios. We also compared Akaike's Information Criteria (AIC),  
43 Bayesian Information Criteria (BIC) and Pseudo-R<sup>2</sup> between the multivariable model which included all  
44 variables (full model) and the model after backward selection approach (reduced model) for model fit.  
45  
46  
47  
48  
49

50 To account for the differences in sampling probabilities across the clusters and strata, sample weighting  
51 was used to adjust for the cluster sampling design using "svy" function in R studio and "svyset" command  
52 to match the multistage cluster sampling design method. Results from univariable and multivariable  
53 analysis were presented as crude and adjusted odds ratios along with their 95% CIs, respectively. A p-  
54 value of <0.05 was considered statistically significant for all analyses.  
55  
56  
57  
58  
59  
60

1  
2  
3 The missing values were imputed using the multiple imputation by chain equation (MICE) methods. The  
4 study explored the proportions of missing values and compared the estimates from the full data models  
5 and the imputed models to see whether there was an observed difference. The multiple imputation was  
6 carried on multivariable analysis only (27). R-studio statistical software was used for all the analyses.  
7  
8  
9

## 10 11 12 **Patient and Public Involvement**

13 The study design was determined by the research team. Participants and the public were not directly  
14 involved in the conceptualisation and design of the study. Selection of study participants for the 2018 MIS  
15 was done in collaboration with the provincial and district health managers. Permission for access to the  
16 dataset used for the current study was granted by the National Malaria Elimination centre in consultation  
17 with the Ministry of Health. A dissemination meeting was held and study findings shared with key  
18 stakeholders, including the Levy Mwanawasa Medical University School of Public Health, Ministry of  
19 Health and Zambia National Public Health Institute. A final report was also written and shared with the  
20 funding organization.  
21  
22  
23  
24  
25  
26  
27  
28  
29

## 30 31 **Results**

### 32 33 **Participants**

34 A summary of the recruitment algorithm of study participants is shown below. A total of 4044 women of  
35 reproductive age were eligible to complete the questionnaire. Out of these, 3, 686 (91%) completed the  
36 questionnaire; 358 (9%) did not provide consent and were excluded from the study. A total of 1,381  
37 (34%) participants comprising women who delivered after the new IPTp-SP policy was introduced were  
38 included into the final sample for analysis (**Supplementary figure 1**).  
39  
40  
41  
42  
43

### 44 45 **Demographic characteristics of respondents**

46 Majority (68.9%) of study participants were in the age group 15-29 years; almost one third (30.8%) were  
47 in the age group 30-44 years and 0.3% were aged above 45 years. Close to half (48.9%) had completed  
48 primary education (48.9%), 28.2% had secondary school education and 2.8% had gone up to higher  
49 education. Most respondents (81.3%) lived in rural areas. With regard to province of residence, 19.1%  
50 were from Luapula, 18.0% from Eastern, 17.2% from Western and 4.1% from Copperbelt provinces. One  
51 fifth (21.9%) of the study participants were in lowest wealth quintile; 15.6% were in the middle quintile.  
52 Concerning religion, more than half (56.8%) of study participants were protestants followed by Catholics  
53 (22.2%); Muslims constituted 0.1% of the respondents. Majority (97.3%) attended ANC and most (77.9%)  
54 took less than four doses of IPTp-SP. Majority (71.3%) took three doses of IPTp-SP, 14.5% took two  
55  
56  
57  
58  
59  
60

doses, 7.5% took IPTp-SP 4+ doses, 6.9% took only one dose. The proportions of IPTp-SP uptake increased from IPTp-SP 1 to IPTp-SP 3 and drastically dropped at IPTp-SP 4+. More than half (52.5%) of the study participants had three or more children and 22.2% had two children. Concerning knowledge on malaria prevention measures, most (76.4%) were knowledgeable and only 45.0% were exposed to media messages (Table 1).

**Table 1: Socio-demographic and clinical characteristics of the study participants (N=1381)**

| Variable               | N (%)       | Variable                                  | N (%)       |
|------------------------|-------------|-------------------------------------------|-------------|
| <b>Age(years)</b>      |             | <b>Parity</b>                             |             |
| 15-24                  | 678 (49.1)  | 1                                         | 348 (25.2)  |
| 25-34                  | 497 (36.0)  | 2                                         | 307 (22.2)  |
| 35+                    | 205 (14.8)  | 3+                                        | 725 (52.5)  |
| Missing                | 1 (0.1)     | Missing                                   | 1 (0.1)     |
|                        |             |                                           |             |
| <b>Residence</b>       |             | <b>Got ANC</b>                            |             |
| Rural                  | 1123 (81.3) | Yes                                       | 1344 (97.3) |
| Urban                  | 258 (18.7)  | No                                        | 35 (2.5)    |
|                        |             | Missing                                   | 2 (0.2)     |
|                        |             |                                           |             |
| <b>Province</b>        |             | <b>IPTp-SP Uptake<sup>a</sup></b>         |             |
| Central                | 93 (6.7)    | 1                                         | 80 (6.9)    |
| Copperbelt             | 56 (4.1)    | 2                                         | 167 (14.4)  |
| Eastern                | 249 (18.0)  | 3                                         | 829 (71.3)  |
| Luapula                | 264 (19.1)  | 4+                                        | 87 (7.5)    |
| Lusaka                 | 87 (6.3)    |                                           |             |
| Muchinga               | 95 (6.9)    |                                           |             |
| North-Western          | 90 (6.5)    | <b>Exposure to media message</b>          |             |
| Northern               | 120 (8.7)   | No                                        | 759 (55.0)  |
| Southern               | 90 (6.5)    | Yes                                       | 622 (45.0)  |
| Western                | 237 (17.2)  | Missing                                   |             |
|                        |             |                                           |             |
|                        |             |                                           |             |
| <b>Wealth quintile</b> |             | <b>Knowledge about Malaria prevention</b> |             |
| Low                    | 578 (41.8)  | Not knowledgeable                         | 241 (17.5)  |
| Middle                 | 302 (21.9)  | Knowledgeable                             | 1055 (78.4) |

|                        |             |                                |            |
|------------------------|-------------|--------------------------------|------------|
| High                   | 501 (36.3)  | Missing                        | 85 (6.1)   |
|                        |             |                                |            |
| <b>Education level</b> |             | <b>Basic Malaria knowledge</b> |            |
| Primary                | 675 (48.9)  | Incorrect                      | 351 (25.4) |
| Secondary+             | 428 (31.0)  | Correct                        | 945 (68.4) |
| Missing                | 278 (20.1)  | Missing                        | 85 (6.2)   |
|                        |             |                                |            |
| <b>Religion</b>        |             |                                |            |
| Christian              | 1092 (79.1) |                                |            |
| Non-christian          | 289 (20.9)  |                                |            |

<sup>a</sup> The proportions excludes the missing values

### Predictors for the uptake of adequate doses of IPTp-SP (4+ doses)

The overall uptake of adequate (4+) doses of IPTp-SP was 7.5%. The uptake of 4+ doses of IPTp-SP decreased by level of education ranging from 9.2% for women with primary education to 4.6% for women with higher education. The same trend was observed across age group, i.e. decrease from 8.5 % in 15-24 years age group to 5.5% in age group of 35 and above years. The women from rural area had higher (7.6%) uptake of adequate doses compared to women from urban area (7.2 %). The uptake of adequate doses of SP was highest for women in the low wealth quintile (11.4 %). Also, women who were not exposed to media messages had higher uptake of SP (8.9%) compared to those who were exposed to media messages (5.9%) (Table 2).

The results of univariate logistic regression analysis (crude odds ratios) show that woman's education level, place of residence, province, wealth quintile, exposure to media messages and knowledge about malaria prevention were significantly associated with the adequate uptake of IPTp-SP. While age group showed no evidence of association with adequate uptake of IPTp-SP. The results in table 2 shows significant lower odds of taking an adequate IPTp-SP among women with at least secondary level of education (0.30, 95%CI 0.15-0.61, p-value=0.001) compared to those with primary level of education. Luapula and Muchinga provinces show significant higher odds of taking an adequate IPTp-SP (13.57, 95%CI 2.98-61.77, p-value=0.001 and 11.50, 95%CI 2.32-56.95, p-value=0.003, respectively) compared to those from Copperbelt.

Women in the middle and high wealth quintile show significant lower odds of taking an adequate IPTp-SP (0.35, 95%CI 0.17-0.72, p-value=0.005 and 0.10, 95%CI 0.10-0.20, p-value<0.001, respectively) compared to those in low wealth quintile. Women who were exposed to media messages had significant

1  
2  
3 lower odds of taking an adequate IPTp-SP (0.49, 95%CI 0.28-0.85, p-value=0.011) compared to those  
4 who were not exposed. Women who had knowledge about malaria prevention had significant lower odds  
5 of taking an adequate IPTp-SP (0.44, 95%CI 0.23-0.86, p-value=0.016) compared to those who had  
6 none.  
7  
8  
9

10 Using backward selection method with p-value threshold of 0.2, the reduced (final) model retained age  
11 group, education level, province and wealth quintile. Therefore, after adjusting for age group, education  
12 level and wealth quintile, Luapula and Muchinga provinces still showed significant higher (though  
13 reduced) odds of taking an adequate IPTp-SP (8.72, 95%CI 1.72-44.26, p-value=0.009 and 6.67, 95%CI  
14 1.19-37.47, p-value=0.031, respectively) compared to those from Copperbelt. And after adjusting for age  
15 group, education level and province, only women in the higher wealth quintile had significant lower odds  
16 of taking an adequate IPTp-SP (0.32, 95%CI 0.13-0.79, p-value=0.014) compared to those in low wealth  
17 quintile.  
18  
19  
20  
21  
22  
23  
24

25 Comparing AIC, BIC and Pseudo-R2 we have 417.7, 490.2 and 0.09 for the reduced model, and 436.7,  
26 496.3 and 0.08 for the full model, respectively. This suggests that the reduced model is better fitted  
27 compared to the full model. This is because the AIC and BIC are lower, and Pseudo-R2 is higher for the  
28 reduced model compared to the full model. The proportion of missing values were highest under  
29 education level variable which accounted to 20.1%. Comparing estimates of full data model from  
30 multivariable analysis (appendix 3) and the imputed multivariable analysis, there is no much difference  
31 in the estimates apart from the fact that the 95% CI are narrower in some instances in imputed model  
32 compared to full data model. However, estimates from multiple imputation are only valid when data is at  
33 least missing at random (**Table 2**).  
34  
35  
36  
37  
38  
39  
40  
41  
42  
43  
44

45 **Table 2: Predictors for the adequate uptake of IPTp-SP ( $\geq 4$  doses) during pregnancy in Zambia**

| Variable                     | n(weighted) | n(%)     | cOR <sup>a</sup> | 95% CI <sup>b</sup> | p-value | aOR <sup>c</sup> | 95% CI        | P-value |
|------------------------------|-------------|----------|------------------|---------------------|---------|------------------|---------------|---------|
| Overall                      | 1163        | 87 (7.5) |                  |                     |         |                  |               |         |
| <b>Age group<br/>(Years)</b> |             |          |                  |                     |         |                  |               |         |
| 15-24                        | 542         | 46 (8.5) | 1.00             |                     |         | 1.00             |               |         |
| 25-34                        | 441         | 31 (7.0) | 0.67             | 0.37-1.21           | 0.181   | 0.54             | 0.26-<br>1.08 | 0.083   |

|                                   |     |          |       |            |         |      |            |        |
|-----------------------------------|-----|----------|-------|------------|---------|------|------------|--------|
| 35+                               | 180 | 10 (5.5) | 0.58  | 0.24-1.35  | 0.202   | 0.58 | 0.23-1.51  | 0.266  |
| <b>**Education level</b>          |     |          |       |            |         |      |            |        |
| Primary                           | 542 | 50 (9.2) | 1.00  |            |         | 1.00 |            |        |
| Secondary+                        | 396 | 18 (4.6) | 0.30  | 0.15-0.61  | 0.001*  | 0.55 | 0.27-1.11  | 0.093  |
| <b>Residence</b>                  |     |          |       |            |         |      |            |        |
| Rural                             | 927 | 70 (7.6) | 1.00  |            |         |      |            |        |
| Urban                             | 219 | 17 (7.2) | 0.22  | 0.11-0.44  | <0.001* |      |            |        |
| <b>Province</b>                   |     |          |       |            |         |      |            |        |
| Copperbelt                        | 44  | 2 (4.6)  | 1.00  |            |         | 1.00 |            |        |
| Central                           | 89  | 3 (3.4)  | 2.15  | 0.28-16.78 | 0.463   | 2.03 | 0.27-15.48 | 0.493  |
| Eastern                           | 210 | 11 (5.2) | 1.72  | 0.32-9.35  | 0.528   | 1.15 | 0.19-7.00  | 0.878  |
| Luapula                           | 196 | 36(18.4) | 13.57 | 2.98-61.77 | 0.001*  | 8.72 | 1.72-44.26 | 0.009* |
| Lusaka                            | 70  | 0 (0.0)  | -     | -          | -       | -    | -          | -      |
| Muchinga                          | 83  | 13(15.7) | 11.50 | 2.32-56.95 | 0.003*  | 6.67 | 1.19-37.47 | 0.031* |
| North-western                     | 84  | 4 (4.8)  | 2.32  | 0.38-14.08 | 0.359   | 2.08 | 0.32-13.34 | 0.441  |
| Northern                          | 111 | 16(14.4) | 8.94  | 1.86-42.87 | 0.006   | 4.13 | 0.73-23.42 | 0.109  |
| Southern                          | 80  | 1 (1.3)  | 0.82  | 0.07-9.59  | 0.873   | 1.40 | 0.11-17.90 | 0.794  |
| Western                           | 196 | 1 (0.5)  | 0.53  | 0.05-6.13  | 0.608   | -    | -          | -      |
| <b>Wealth quintile</b>            |     |          |       |            |         |      |            |        |
| Low                               | 438 | 50(11.4) | 1.00  |            |         | 1.00 |            |        |
| Middle                            | 259 | 16 (6.2) | 0.35  | 0.17-0.72  | 0.005*  | 0.52 | 0.19-1.45  | 0.212  |
| High                              | 466 | 21 (4.5) | 0.10  | 0.10-0.20  | <0.001* | 0.32 | 0.13-0.79  | 0.014* |
| <b>Exposure to media messages</b> |     |          |       |            |         |      |            |        |



|                                             |     |          |      |           |        |  |  |  |
|---------------------------------------------|-----|----------|------|-----------|--------|--|--|--|
| No                                          | 607 | 54 (8.9) | 1.00 |           |        |  |  |  |
| Yes                                         | 556 | 33 (5.9) | 0.49 | 0.28-0.85 | 0.011* |  |  |  |
| <b>**Knowledge about malaria prevention</b> |     |          |      |           |        |  |  |  |
| Not knowledgeable                           | 180 | 22(12.2) | 1.00 |           |        |  |  |  |
| Knowledgeable                               | 920 | 60 (6.5) | 0.44 | 0.23-0.86 | 0.016* |  |  |  |

<sup>a</sup>cOR stands for Crude Odds ratio <sup>b</sup>CI stands for Confidence interval <sup>c</sup>aOR stands for adjusted odds ratio

\*significant at 5% level \*\*The observations do not add up to the overall sample because the variables have missing values. Note: AIC, BIC and Pseudo-R2 are 417.7, 490.2 and 0.09 for the reduced model, and 436.7, 496.3 and 0.08 for the model which included all the variables (full model) in the table, respectively

## Discussion

The study aimed to determine the predictors of IPTp-SP uptake for four or more doses in Zambia. Our findings show that uptake of four or more doses of IPTp-SP was low at 7.5%. The place and province of residence were significantly associated with adequate uptake of IPTp-SP doses. Women who were residents of Luapula and Muchinga provinces had higher odds of taking adequate doses with reference to those in the Copperbelt province. Conversely, women in the highest wealth quintile were significantly less likely to receive IPTp-SP 4+ doses compared to those in the lowest quintile. Knowledge about malaria prevention and exposure to media messages was associated with low odds of adequate IPTp-SP uptake.

Our findings show an association between IPTp-SP uptake and place of residence. Women from rural provinces such as Muchinga and Luapula showed higher odds of IPTp-SP uptake than those from urban provinces of Copperbelt and Lusaka. The observed variation in the odds of IPTp-SP uptake between the urban and rural provinces could be due to differences in the malaria prevalence among these provinces. For example, Luapula province has a high malaria prevalence of 63% compared to 3% in Lusaka and Southern provinces. The province is rural with many water bodies, enhancing malaria transmission. These factors also make malaria transmission likely to be longer and more intense compared to other provinces. Thus, the province continues to report the largest malaria burden in the country.

1  
2  
3 Women in provinces with low prevalence of malaria may not take adequate IPTp-SP due to low perceived  
4 risk (28). On the contrary, women from regions of high level of malaria transmission, may take adequate  
5 doses of IPTp-SP due to higher risk perception. In these regions, emphasis on SP uptake during  
6 awareness messages could be higher due to the higher risk of contracting malaria. This finding could  
7 reflect that women in rural areas may consider themselves at higher risk of contracting malaria compared  
8 to those in urban areas (29). Exploratory studies are required to investigate the reasons for the variations  
9 in uptake of IPTp-SP among different provinces.

10  
11  
12 These findings corroborate those from studies conducted in Tanzania and Uganda which showed that  
13 variations in IPTp-SP uptake were related to differences in malaria transmission in the regions. The study  
14 in Tanzania showed that residents of the Central, Eastern, Southern, Lake regions, Southern highlands  
15 and South west highlands were significantly associated with the optimal uptake of SP doses compared  
16 to the residents of Zanzibar and Northern zones where malaria transmission was low. Similarly, the  
17 Uganda study showed that pregnant women residing in Eastern and Coastal regions had higher odds of  
18 optimal uptake of SP (30).

19  
20  
21 Our findings showed no significant association between education level and uptake of IPTp-SP. However,  
22 univariate analysis showed that women who attained secondary education had less odds of taking four  
23 or more doses of IPTp-SP compared with those who attained primary education. None of the women who  
24 attained higher education took four or more doses of IPTp-SP. Our findings contract previous studies and  
25 surveys. Literally, one would expect that having higher educational level may be of influence on the  
26 uptake of the recommended doses of IPTp-SP compared to women with a lower education level. A study  
27 which compared Malaria Indicators Survey of 12 countries in sub-Saharan Africa (30) found that women  
28 with higher education had higher odds of reporting receiving three or more doses of IPTp-SP. The  
29 differences in the findings could be as a result of using different methods. Furthermore, the findings in  
30 our study show that a large proportion of women who took four or more doses resided in rural areas and  
31 that many people from the rural areas with low educational level (31).

32  
33  
34 This study found that women in the highest and middle wealth quintile had less odds of taking four or  
35 more doses of IPTp-SP compared to those in the lowest wealth quintile. This finding contradicts previous  
36 studies which revealed that wealth index has a significant effect on uptake of IPTp-SP. These studies  
37 showed that the chances of completing the recommended dose of IPTp-SP increased with increase in  
38 wealth index (32). A study done in Senegal found that women in richer or middle wealth quintile were  
39 more likely to use the recommended doses of IPTp-SP (33). The reason for the difference between our  
40 findings and these studies could be due to confounding by place of residence. Our findings show that  
41  
42  
43  
44  
45  
46  
47  
48  
49  
50  
51  
52  
53  
54  
55  
56  
57  
58  
59  
60

1  
2  
3 most study participants who took four or more doses of IPTp-SP were from the rural areas who are mostly  
4 in the low wealth quintile. The other reason is the fact that IPTp-SP is provided for free in Zambia.  
5  
6

7 Our findings show that participants who had knowledge about malaria prevention and exposure to media  
8 messages had less odds of receiving adequate IPTp-SP doses. These findings contradict the literature  
9 which has shown that effective uptake of IPTp-SP could be realized when pregnant women are  
10 adequately and properly informed about malaria interventions. Studies conducted in Zambia and Ghana  
11 (34) showed that maternal knowledge on IPTp-SP positively influenced the uptake of the intervention.  
12 The difference in findings could be that our study did not assess specifically the knowledge about IPTp-  
13 SP and its benefits. Rather, the study focused on knowledge about malaria prevention in general. Studies  
14 show that women who understand the benefits of IPTp-SP and know the recommended SP doses are  
15 more likely to receive the adequate dosage. This calls for more awareness on malaria interventions in  
16 general and in particular about the recommended doses of IPTp-SP during pregnancy.  
17  
18  
19  
20  
21  
22  
23  
24

25 Regarding teenage mothers, there were no significant associations noted in taking four or more doses of  
26 IPTp-SP. However, the highest proportion of women who took four or more doses of IPTp-SP was noted  
27 among teenage mothers. This may be due to the fact that the majority of our study participants were from  
28 the rural areas and that teenage pregnancy in rural areas is high in Zambia (35).  
29  
30  
31

32 Literature reveals that younger women may lack adequate access to information and communication  
33 channels used for IPTp-SP promotion and this may impact negatively on the uptake of IPTp-SP. More  
34 attention is needed to this age group as reported in a study conducted in Ghana where low uptake of the  
35 recommended dose was seen among this population group (36). Teenagers often hide their pregnancies  
36 and delay in ANC attendance and are therefore not able to take the recommended doses before they  
37 deliver (36).  
38  
39  
40  
41  
42  
43

44 This study further reports that the uptake of four or more doses of IPTp-SP during pregnancy is still low  
45 at 7.5% compared to the recommended coverage of 80% by the WHO and Roll Back Malaria (RBM)  
46 benchmark target. The highest proportion of women took up to the third dose of IPTp-SP during  
47 pregnancy. This finding could be due lack of awareness about the fourth dose. More emphasis is still  
48 being placed on taking at least three or more doses of IPTp-SP. Health messages should focus on and  
49 emphasise the new policy on four or more doses in the country.  
50  
51  
52  
53

54 The study findings are similar to other studies in the sub-Saharan Africa which reported the low uptake  
55 of the recommended doses of IPTp-SP (37). This may suggest that many countries in sub-Saharan  
56 Africa are still struggling to reach their recommended IPTp service coverage. Hence, the urgent need for  
57 strategies to increase IPTp-SP coverage for improved maternal and newborn health outcomes. This  
58  
59  
60

1  
2  
3 may contribute to the ambitious sustainable development goals (SDG) and target of reducing maternal  
4 mortality rate (MMR) from 319 to 70 per 100,000 live births (38-42).  
5  
6

### 7 **Study limitations**

8  
9 This study has potential limitations. First, we did not collect the data, but used secondary data from the  
10 2018 MIS. This prevented the team from having any control over the measurement and selection of the  
11 variables. Some important variables that would have been of interest such as distance from the health  
12 facility to the communities where people live, stocks of SP, timing of ANC and number of times the woman  
13 attended ANC were not contained in the data set and thus could not be analysed. Further, the MIS data  
14 were cross-sectional, the associations in this study cannot guarantee any causation or directionality.  
15  
16  
17  
18  
19

20 Despite these limitations, we believe our findings have provided important information on the low  
21 coverage of four or more doses of IPTp-SP and the associated factors. In addition, use of a nationally  
22 representative data from the 2018 MIS that covered all the provinces increases the generalisability of our  
23 findings.  
24  
25  
26  
27

### 28 **Conclusion**

29  
30 These findings confirm low uptake of four or more doses of IPTp-SP in Zambia at 7.5%. Various factors  
31 including province and place of residence, wealth quintile, knowledge about malaria prevention and  
32 exposure to media messages are significantly associated with IPTp-SP uptake. Strategies and  
33 interventions aimed at improving uptake and coverage of IPTp-SP must focus on women in high wealth  
34 quintile from urban areas with low malaria transmission in the country. Interventions should include health  
35 messages with emphasis on the new policy of four or more doses of IPTp-SP. Messages should also  
36 stress the benefits of strengthening the linkage between IPTp-SP program with ANC services for optimal  
37 uptake of IPTp-SP.  
38  
39  
40  
41  
42  
43  
44  
45  
46

### 47 **Figure Legend/Caption**

48  
49 Figure 1 : Participant recruitment algorithm  
50

### 51 **Authors' Contribution**

52  
53 DS, CS, and NM contributed to the conception of the study and literature search. DS conducted the  
54 extraction, analysis and drafted the manuscript. CS, NM, BH LSM and HM contributed to the coordination  
55 study activities. CS, NM, BH contributed to the revision of the manuscript. All authors read and approved  
56 the manuscript.  
57  
58  
59  
60

## Funding Statement

Presidential Malaria Initiative and Centres for Disease Prevention and Control

## Competing Interests

All authors declare that they have no conflicting interests in this work

## Ethics approval

Ethical approval and waiver of consent was given by ERES converge IRB (Ref No. 2021-Nov-004). Permission to conduct the study and access to the 2018 MIS dataset was granted by the National Health Research Authority (NRFA) Ref No. NHRA000023/04/03/2022) and Ministry of Health, respectively. The dataset was then secured as soft copy in the computer. No information regarding names of study participants was obtained and used; the dataset was only used for the purpose of this study and it was not given to any other person or organization. No harm was inflicted to the participants, the study used secondary data and there was no direct contact with study participants.

## Data Sharing

Data are available upon reasonable request from the corresponding author and with permission of the ERES ethics review board.

## Costs and payments

N/A

## Acknowledgements

We thank Lusaka District Health Management Team who provided field research assistants and study participants. The GTFCC supported the country with OCV stocks and operations funds.

## Acknowledgements

We thank the Field Epidemiology Training Program staff from Levy Mwanawasa Medical University, School of Public Health for their support; Prof Victor Mukonk, Dean School of Public Health for facilitating the MSc. Field Epidemiology program at the university; Ms Heilmann Elizabeth Susan for her support in R studio; US CDC staff and Dr Paul Pyschus for their invaluable support during the development of this research idea. Special thanks go to the National Malaria Elimination Centre management for granting access to the Malaria Indicator Survey (MIS) dataset.

## References

1. Gnémé A, Guelbéogo WM, Riehle MM, Tiono AB, Diarra A, Kabré GB, et al. Plasmodium species occurrence, temporal distribution and interaction in a child-aged population in rural Burkina Faso. *Malar J*. 2013 Feb 19;12:67.
2. Mushi V, Mbotwa CH, Zacharia A, Ambrose T, Moshi FV. Predictors for the uptake of optimal doses of sulfadoxine-pyrimethamine for intermittent preventive treatment of malaria during pregnancy in Tanzania: further analysis of the data of the 2015–2016 Tanzania demographic and health survey and malaria indicator survey. *Malar J*. 2021 Feb 6;20(1):75.
3. U.S. President's Malaria Initiative Zambia Malaria Operational Plan FY 2020 [Internet]. [cited 2021 Jun 15]. Available from: [www.pmi.gov](http://www.pmi.gov)
4. World Health Organisation policy brief for the Implementation of Intermittent Preventive Treatment of Malaria in Pregnancy Using Sulfadoxine-Pyrimethamine (IPTp-SP). WHO Press. 2014;(October 2012):1–13.
5. World malaria report 2020: 20 years of global progress and challenges. :299.
6. Dellicour S, Tatem AJ, Guerra CA, Snow RW, Kuile FO. Quantifying the number of pregnancies at risk of malaria in 2007: A demographic study. *PLoS Med* [Internet]. 2010;7. Available from: <https://doi.org/10.1371/journal.pmed.1000221>
7. Schantz-Dunn J, Nour NM. Malaria and Pregnancy: A Global Health Perspective. *Rev Obstet Gynecol*. 2009;2(3):186–92.
8. Desai M, ter Kuile FO, Nosten F, McGready R, Asamoah K, Brabin B, et al. Epidemiology and burden of malaria in pregnancy. *Lancet Infect Dis*. 2007 Feb;7(2):93–104.
9. Thiam S, Kimotho V, Gatonga P. Why are IPTp coverage targets so elusive in sub-Saharan Africa? A systematic review of health system barriers. *Malar J*. 2013 Oct 3;12(1):353.
10. Chaponda EB, Chandramohan D, Michelo C, Mharakurwa S, Chipeta J, Chico RM. High burden of malaria infection in pregnant women in a rural district of Zambia: a cross-sectional study. *Malar J* [Internet]. 2015 Sep 30 [cited 2021 Jan 9];14. Available from: <https://www.ncbi.nlm.nih.gov/pmc/articles/PMC4590700/>
11. National+Malaria+Elimination+Strategic+Plan+2017-Final\_PRINT.pdf [Internet]. [cited 2021 Jan 15]. Available from:

1  
2  
3 [https://static1.squarespace.com/static/58d002f017bffc99fe21889/t/5b28d7f1575d1ff0942dbce1](https://static1.squarespace.com/static/58d002f017bffc99fe21889/t/5b28d7f1575d1ff0942dbce1/1529403401067/National+Malaria+Elimination+Strategic+Plan+2017-Final_PRINT.pdf)  
4 [/1529403401067/National+Malaria+Elimination+Strategic+Plan+2017-Final\\_PRINT.pdf](https://static1.squarespace.com/static/58d002f017bffc99fe21889/t/5b28d7f1575d1ff0942dbce1/1529403401067/National+Malaria+Elimination+Strategic+Plan+2017-Final_PRINT.pdf)  
5  
6

- 7  
8 12. ANC Guidelines for a Positive Pregnancy Experience , Ministry of Health, Zambia. :39.  
9  
10 13. Sikambale C, Halwindi H, Baboo KS. Factors Influencing Utilization of Intermittent Presumptive  
11 Treatment of Malaria (IPTp) Services by Pregnant Women in Sesheke District of Western  
12 Province Zambia. *Med J Zambia*. 2013 Mar 21;40(1):24–32.  
13  
14 14. Zakama AK, Ozarslan N, Gaw SL. Placental Malaria. *Curr Trop Med Rep*. 2020;7(4):162–71.  
15  
16 15. Greenwood AM, Armstrong JR, Byass P, Snow RW, Greenwood BM. Malaria chemoprophylaxis,  
17 birth weight and child survival. *Trans R Soc Trop Med Hyg*. 1992;86(5):483–5.  
18  
19 16. Steketee RW, Nahlen BL, Parise ME, Menendez C. The burden of malaria in pregnancy in  
20 malaria-endemic areas. *Am J Trop Med Hyg*. 2001;64(1-2 Suppl):28–35.  
21  
22 17. Corbett S s., Drewett R f. To what extent is failure to thrive in infancy associated with poorer  
23 cognitive development? A review and meta-analysis. *J Child Psychol Psychiatry*.  
24 2004;45(3):641–54.  
25  
26 18. Agarwal P, Lim SB. Long-term follow-up and outcome of extremely-low-birth-weight (ELBW)  
27 infants. *Ann Acad Med Singapore*. 2003 May;32(3):346–53.  
28  
29 19. Mace KE, Chalwe V, Katalenich BL, Nambozi M, Mubikayi L, Mulele CK, et al. Evaluation of  
30 sulphadoxine-pyrimethamine for intermittent preventive treatment of malaria in pregnancy: a  
31 retrospective birth outcomes study in Mansa, Zambia. *Malar J*. 2015 Feb 7;14(1):69.  
32  
33 20. Maiga OM, Kayentao K, Traoré BT, Djimde A, Traoré B, Diallo M, et al. Superiority of 3 Over 2  
34 Doses of Intermittent Preventive Treatment With Sulfadoxine-Pyrimethamine for the Prevention  
35 of Malaria During Pregnancy in Mali: A Randomized Controlled Trial. *Clin Infect Dis*. 2011 Aug  
36 1;53(3):215–23.  
37  
38 21. Zambia\_MIS 2018\_Final-withSigs\_20190415.pdf [Internet]. [cited 2021 Jan 15]. Available from:  
39 [https://www.malariasurveys.org/documents/Zambia\\_MIS2018\\_FINAL-withSigs\\_20190415.pdf](https://www.malariasurveys.org/documents/Zambia_MIS2018_FINAL-withSigs_20190415.pdf)  
40  
41 22. Zambia Geography - Where is Zambia, What's in Zambia? [Internet]. [cited 2022 Aug 4].  
42 Available from: <https://www.victoriafalls-guide.net/zambia-geography.html>  
43  
44  
45  
46  
47  
48  
49  
50  
51  
52  
53  
54  
55  
56  
57  
58  
59  
60

- 1  
2  
3 23. 2022 Census – Zambia Statistics Agency [Internet]. 2022 [cited 2023 Jan 31]. Available from:  
4 <https://www.zamstats.gov.zm/2022-census/>  
5  
6
- 7  
8 24. Riedel N, Vounatsou P, Miller JM, Gosoni L, Chizema-Kawesha E, Mukonka V, et al.  
9 Geographical patterns and predictors of malaria risk in Zambia: Bayesian geostatistical modelling  
10 of the 2006 Zambia national malaria indicator survey (ZMIS). *Malar J*. 2010;9(1).  
11  
12
- 13  
14 25. Pourhoseingholi MA, Vahedi M, Rahimzadeh M. Sample size calculation in medical studies.  
15 *Gastroenterol Hepatol Bed Bench*. 2013;6(1):14–7.  
16  
17
- 18  
19 26. Darteh EKM, Dickson KS, Ahinkorah BO, Owusu BA, Okyere J, Salihu T, et al. Factors  
20 influencing the uptake of intermittent preventive treatment among pregnant women in sub-  
21 Saharan Africa: a multilevel analysis. *Arch Public Health*. 2021 Oct 21;79:182.  
22  
23
- 24  
25 27. Rubin DB. Inference and Missing Data. *Biometrika*. 1976;63(3):581–92.  
26  
27
- 28  
29 28. Mutanyi JA, Onguru DO, Ogolla SO, Adipo LB. Determinants of the uptake of intermittent  
30 preventive treatment of malaria in pregnancy with sulphadoxine pyrimethamine in Sabatia Sub  
31 County, Western Kenya. *Infect Dis Poverty*. 2021 Aug 6;10:106.  
32  
33
- 34  
35 29. Okoli CI, Hajizadeh M, Rahman MM, Khanam R. Decomposition of socioeconomic inequalities  
36 in the uptake of intermittent preventive treatment of malaria in pregnancy in Nigeria: evidence  
37 from Demographic Health Survey. *Malar J*. 2021 Jul 3;20:300.  
38  
39
- 40  
41 30. Okethwangu D, Opigo J, Atugonza S, Kizza CT, Nabatanzi M, Biribawa C, et al. Factors  
42 associated with uptake of optimal doses of intermittent preventive treatment for malaria among  
43 pregnant women in Uganda: analysis of data from the Uganda Demographic and Health Survey,  
44 2016. *Malar J*. 2019 Jul 26;18(1):250.  
45  
46
- 47  
48 31. Burger R. School effectiveness in Zambia: The origins of differences between rural and urban  
49 outcomes. *Dev South Afr*. 2011 Jun 1;28:157–76.  
50  
51
- 52  
53 32. Oppong FB, Gyaase S, Zandoh C, Nettey OEA, Amenga-Etego S, Anane EA, et al. Intermittent  
54 preventive treatment of pregnant women in Kintampo area of Ghana with sulphadoxine-  
55 pyrimethamine (SP): trends spanning 2011 and 2015. *BMJ Open*. 2019 Jun;9(6):e027946.  
56  
57  
58  
59  
60



- 1  
2  
3  
4  
5  
6  
7  
8  
9  
10  
11  
12  
13  
14  
15  
16  
17  
18  
19  
20  
21  
22  
23  
24  
25  
26  
27  
28  
29  
30  
31  
32  
33  
34  
35  
36  
37  
38  
39  
40  
41  
42  
43  
44  
45  
46  
47  
48  
49  
50  
51  
52  
53  
54  
55  
56  
57  
58  
59  
60
33. Mbengue MAS, Bei AK, Mboup A, Ahouidi A, Sarr M, Mboup S, et al. Factors influencing the use of malaria prevention strategies by women in Senegal: a cross-sectional study. *Malar J.* 2017 Nov 21;16:470.
  34. Ayiisi EA. Knowledge and Utilization of Intermittent Preventive Treatment (IPT) for Malaria Control Among Pregnant Women Attending Antenatal Clinics in the Sunyani West District of Ghana. *Sci J Public Health.* 2017 Apr 15;5(3):254.
  35. Blystad A, Moland KM, Munsaka E, Sandøy I, Zulu J. Vanilla biscuits and lobola bridewealth: parallel discourses on early pregnancy and schooling in rural Zambia. *BMC Public Health.* 2020 Oct 1;20(1):1485.
  36. Bouyou-Akotet MK, Mawili-Mboumba DP, Kombila M. Antenatal care visit attendance, intermittent preventive treatment and bed net use during pregnancy in Gabon. *BMC Pregnancy Childbirth.* 2013 Dec;13(1):52.
  37. Odjidja EN, Kwanin C, Saha M. Low Uptake of Intermittent Preventive Treatment in Ghana; An Examination of Health System Bottlenecks. *Health Syst Policy Res.* 4(3):0–0.
  38. Massar, C Sialubanje, I Maltagliati, RAC Ruitter. Exploring the perceived effectiveness of applied theater as a maternal health promotion tool in rural Zambia- Qualitative Health Research, 2018; 28(12) 1933–1943
  39. Sialubanje C, Sitali DC, Mukumbuta N, Liyali L, Sumbwa PI, Kamboyi HK et al. Perspectives on factors influencing transmission of COVID-19 in Zambia: a qualitative study of health workers and community members. *BMJ Open* 2022;12:e057589. doi: 10.1136/bmjopen-2021-057589
  40. Sialubanje C, Mukumbuta N, Ng'andu M, Sumani EM, Nkonkomalimba M, Lyatumba DEM et al. Perspectives on the COVID-19 vaccine uptake: a qualitative study of community members and health workers in Zambia. *BMJ Open* 2022;12:e058028. doi: 10.1136/bmjopen-2021-058028
  41. Sialubanje C, Kaiser JL, Ngoma T, Mwananyanda L, Fong RM, Hamer DH, Scott NA. Postnatal care services in rural Zambia: a qualitative exploration of user, provider, and community perspectives on quality of care. *BMC pregnancy and childbirth.* 2023;23(1):39.

- 1  
2  
3 42. Sialubanje C, Sitali DC, Mukumbuta N, *et al.* Perspectives on factors influencing transmission of  
4 COVID-19 in Zambia: a qualitative study of health workers and community members. *BMJ*  
5 *Open* 2022;**12**:e057589. doi: 10.1136/bmjopen-2021-057589  
6  
7  
8  
9  
10  
11  
12  
13  
14  
15  
16  
17  
18  
19  
20  
21  
22  
23  
24  
25  
26  
27  
28  
29  
30  
31  
32  
33  
34  
35  
36  
37  
38  
39  
40  
41  
42  
43  
44  
45  
46  
47  
48  
49  
50  
51  
52  
53  
54  
55  
56  
57  
58  
59  
60

For peer review only

1  
2  
3  
4  
5  
6  
7  
8  
9  
10  
11  
12  
13  
14  
15  
16  
17  
18  
19  
20  
21  
22  
23  
24  
25  
26  
27  
28  
29  
30  
31  
32  
33  
34  
35  
36  
37  
38  
39  
40  
41  
42  
43  
44  
45  
46  
47  
48  
49  
50  
51  
52  
53  
54  
55  
56  
57  
58  
59  
60

For peer review only

1  
2  
3 **Figure 1:** Flow diagram for participant selection  
4  
5  
6

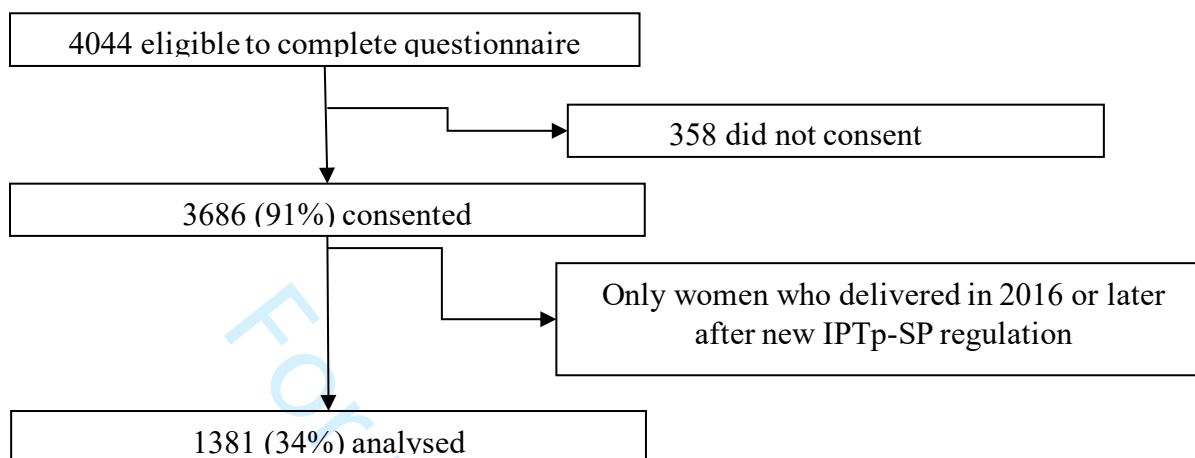

**STROBE Statement—Checklist of items that should be included in reports of descriptive studies**

| Item                           | Recommendation                                                                                                                                                                                                                                                                                     | Page |
|--------------------------------|----------------------------------------------------------------------------------------------------------------------------------------------------------------------------------------------------------------------------------------------------------------------------------------------------|------|
| Title and abstract             | Indicate the study's design with a commonly used term in the title or the abstract                                                                                                                                                                                                                 | 1    |
|                                | Provide in the abstract an informative and balanced summary of what was done and what was found                                                                                                                                                                                                    | 2    |
| Introduction                   |                                                                                                                                                                                                                                                                                                    |      |
| Background/rationale           | Explain the scientific background and rationale for the investigation being reported                                                                                                                                                                                                               | 4    |
| Objectives                     | State specific objectives, including any pre-specified hypotheses                                                                                                                                                                                                                                  | 5    |
| Methods                        |                                                                                                                                                                                                                                                                                                    |      |
| Study design                   | Present key elements of study design early in the paper                                                                                                                                                                                                                                            | 5    |
| Setting                        | Describe the setting, locations, and relevant dates, including periods of recruitment, exposure, follow-up, and data collection                                                                                                                                                                    | 6    |
| Participants                   | Give the eligibility criteria, and the sources and methods of selection of participants. Describe methods of follow-up                                                                                                                                                                             | 6    |
| Study size                     | Explain how the study size was arrived at                                                                                                                                                                                                                                                          | 7    |
| Variables                      | Clearly define all outcomes, exposures, predictors, potential confounders, and effect modifiers. Give diagnostic criteria, if applicable                                                                                                                                                           | 7    |
| Data sources/ measurement      | For each variable of interest, give sources of data and details of methods of assessment (measurement). Describe comparability of assessment methods if there is more than one group                                                                                                               | 8    |
|                                |                                                                                                                                                                                                                                                                                                    |      |
| Statistical methods            | Describe all statistical methods, including those used to control for confounding                                                                                                                                                                                                                  | 8    |
|                                | If applicable, explain how loss to follow-up was addressed                                                                                                                                                                                                                                         |      |
| Patient and public involvement |                                                                                                                                                                                                                                                                                                    | 8    |
| Results                        |                                                                                                                                                                                                                                                                                                    |      |
| Participants                   | Report numbers of individuals at each stage of study—eg numbers potentially eligible, examined for eligibility, confirmed eligible, included in the study, completing follow-up, and analysed (b) Give reasons for non-participation at each stage Participants (c) Consider use of a flow diagram | 9    |
| Descriptive statistics         | (a) Give characteristics of study participants (eg demographic, clinical, social) and information on exposures and potential confounders<br>Descriptive data<br>(b) Indicate number of participants with missing data for each variable of interest                                                | 9    |
| Main results                   |                                                                                                                                                                                                                                                                                                    | 10   |
| Discussion                     |                                                                                                                                                                                                                                                                                                    | 14   |

|    |             |    |
|----|-------------|----|
| 1  |             |    |
| 2  |             |    |
| 3  | Limitations | 16 |
| 4  | Conclusion  | 17 |
| 5  | References  | 18 |
| 6  |             |    |
| 7  |             |    |
| 8  |             |    |
| 9  |             |    |
| 10 |             |    |
| 11 |             |    |
| 12 |             |    |
| 13 |             |    |
| 14 |             |    |
| 15 |             |    |
| 16 |             |    |
| 17 |             |    |
| 18 |             |    |
| 19 |             |    |
| 20 |             |    |
| 21 |             |    |
| 22 |             |    |
| 23 |             |    |
| 24 |             |    |
| 25 |             |    |
| 26 |             |    |
| 27 |             |    |
| 28 |             |    |
| 29 |             |    |
| 30 |             |    |
| 31 |             |    |
| 32 |             |    |
| 33 |             |    |
| 34 |             |    |
| 35 |             |    |
| 36 |             |    |
| 37 |             |    |
| 38 |             |    |
| 39 |             |    |
| 40 |             |    |
| 41 |             |    |
| 42 |             |    |
| 43 |             |    |
| 44 |             |    |
| 45 |             |    |
| 46 |             |    |
| 47 |             |    |
| 48 |             |    |
| 49 |             |    |
| 50 |             |    |
| 51 |             |    |
| 52 |             |    |
| 53 |             |    |
| 54 |             |    |
| 55 |             |    |
| 56 |             |    |
| 57 |             |    |
| 58 |             |    |
| 59 |             |    |
| 60 |             |    |

For peer review only

# BMJ Open

## Uptake of Four or More Doses of Sulfadoxine Pyrimethamine for Intermittent Preventive Treatment of Malaria during Pregnancy in Zambia: Findings from the 2018 Malaria in Pregnancy Survey

|                                 |                                                                                                                                                                                                                                                                                                                                                                                                                                                                                                                                                                               |
|---------------------------------|-------------------------------------------------------------------------------------------------------------------------------------------------------------------------------------------------------------------------------------------------------------------------------------------------------------------------------------------------------------------------------------------------------------------------------------------------------------------------------------------------------------------------------------------------------------------------------|
| Journal:                        | <i>BMJ Open</i>                                                                                                                                                                                                                                                                                                                                                                                                                                                                                                                                                               |
| Manuscript ID                   | bmjopen-2023-073287.R1                                                                                                                                                                                                                                                                                                                                                                                                                                                                                                                                                        |
| Article Type:                   | Original research                                                                                                                                                                                                                                                                                                                                                                                                                                                                                                                                                             |
| Date Submitted by the Author:   | 18-Apr-2023                                                                                                                                                                                                                                                                                                                                                                                                                                                                                                                                                                   |
| Complete List of Authors:       | Sinyange, Danny; Levy Mwanawasa Medical University, School of Public Health; Zambia National Public Health Institute, Zambia Field Epidemiology Training Program<br>Mukumbuta, Nawa; Levy Mwanawasa Medical University, School of Public Health; Stellenbosch University, Public Health<br>Mutale, Lwito; Zambia National Public Health Institute<br>Mumbole, Hudson; Zambia Ministry of Health, ZAMBART<br>Hainza, Busiku ; Zambia Ministry of Health, National Malaria Elimination Centre<br>Sialubanje, Cephas; Levy Mwanawasa Medical University, School of Public Health |
| <b>Primary Subject Heading</b>: | Epidemiology                                                                                                                                                                                                                                                                                                                                                                                                                                                                                                                                                                  |
| Secondary Subject Heading:      | Obstetrics and gynaecology, Health services research, Epidemiology, Public health                                                                                                                                                                                                                                                                                                                                                                                                                                                                                             |
| Keywords:                       | EPIDEMIOLOGY, Health Services Accessibility, PUBLIC HEALTH, Maternal medicine < OBSTETRICS                                                                                                                                                                                                                                                                                                                                                                                                                                                                                    |
|                                 |                                                                                                                                                                                                                                                                                                                                                                                                                                                                                                                                                                               |

SCHOLARONE™  
Manuscripts

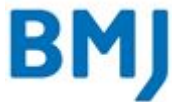

I, the Submitting Author has the right to grant and does grant on behalf of all authors of the Work (as defined in the below author licence), an exclusive licence and/or a non-exclusive licence for contributions from authors who are: i) UK Crown employees; ii) where BMJ has agreed a CC-BY licence shall apply, and/or iii) in accordance with the terms applicable for US Federal Government officers or employees acting as part of their official duties; on a worldwide, perpetual, irrevocable, royalty-free basis to BMJ Publishing Group Ltd ("BMJ") its licensees and where the relevant Journal is co-owned by BMJ to the co-owners of the Journal, to publish the Work in this journal and any other BMJ products and to exploit all rights, as set out in our [licence](#).

The Submitting Author accepts and understands that any supply made under these terms is made by BMJ to the Submitting Author unless you are acting as an employee on behalf of your employer or a postgraduate student of an affiliated institution which is paying any applicable article publishing charge ("APC") for Open Access articles. Where the Submitting Author wishes to make the Work available on an Open Access basis (and intends to pay the relevant APC), the terms of reuse of such Open Access shall be governed by a Creative Commons licence – details of these licences and which [Creative Commons](#) licence will apply to this Work are set out in our licence referred to above.

Other than as permitted in any relevant BMJ Author's Self Archiving Policies, I confirm this Work has not been accepted for publication elsewhere, is not being considered for publication elsewhere and does not duplicate material already published. I confirm all authors consent to publication of this Work and authorise the granting of this licence.



1  
2  
3 **Uptake of Four or More Doses of Sulfadoxine Pyrimethamine for Intermittent Preventive**  
4 **Treatment of Malaria during Pregnancy in Zambia: Findings from the 2018 Malaria in Pregnancy**  
5 **Survey**  
6  
7  
8  
9

10  
11 Danny Sinyange<sup>1,2</sup>, Nawa Mukumbuta<sup>1</sup>, Lwito Salifya Mutale<sup>2</sup>, Hudson Mumbole<sup>4</sup>, Busiku Hamainza<sup>4</sup>,  
12 Cephass Sialubanje<sup>1</sup>  
13  
14  
15  
16  
17

18 **Affiliations**  
19

- 20 1. School of Public Health, Levy Mwanawasa Medical University, Lusaka, Zambia
- 21 2. Zambia National Public Health Institute, Zambia Field Epidemiology Training Program, Lusaka,  
22 Zambia
- 23 3. ZAMBART, Ministry of Health, Lusaka, Zambia
- 24 4. Ministry of Health, National Malaria Elimination Centre, Lusaka, Zambia
- 25
- 26
- 27
- 28
- 29
- 30
- 31
- 32

33 **Corresponding author:** Sialubanje Cephass  
34

35 Email: csialubanje@yahoo.com  
36  
37  
38  
39  
40  
41  
42  
43  
44  
45  
46  
47  
48  
49  
50  
51  
52  
53  
54  
55  
56  
57  
58  
59  
60

## Abstract

**Objective:** To determine the prevalence and predictors of the uptake of four or more doses of sulfadoxine pyrimethamine (IPTp-SP 4+) in Zambia.

**Design:** A cross-sectional study using secondary data from the malaria in pregnancy survey (MIS) dataset conducted from April to May 2018.

**Setting:** The primary survey was conducted at community level and covered all the ten provinces of Zambia.

**Participants:** A total of 3, 686 women of reproductive age (15 to 45 years) who gave birth within the five years before the survey.

**Primary outcome:** Proportion of participants with four or more doses of IPTp-SP

**Statistical analysis:** All analyses were conducted using R-studio statistical software version 4.2.1. Descriptive statistics were computed to summarise participant characteristics and IPTp-SP uptake. Univariate logistic regression was carried out to determine association between the explanatory and outcome variables. Explanatory variables with a p-value less than 0.20 on univariate analysis were included in the multivariable logistic regression model and crude and adjusted odds ratios (AORs) along with their 95% confidence intervals (CIs) were computed ( $p < 0.05$ ).

**Results:** Of the total sample of 1,163, only 7.5% of participants received IPTp-SP 4+. Province of residence and wealth tertile were associated with uptake of IPTp-SP doses; participants from Luapula (aOR=8.72, 95%CI [1.72–44.26,  $p=0.009$ ]) and Muchinga (aOR=6.67, 95%CI [1.19–37.47,  $p=0.031$ ]) provinces were more likely to receive IPTp-SP 4+ compared to those from Copperbelt province. Conversely, women in the highest wealth tertile were less likely to receive IPTp-SP 4+ doses compared to those in the lowest quintile (aOR=0.32; 95%CI [0.13–0.79,  $p=0.014$ ])

**Conclusion:** These findings confirm a low uptake of four or more doses of IPTp-SP in the country. Strategies should focus on increased coverage of IPTp-SP in provinces with much higher malaria burden where the risk is greatest and the ability to afford health care lowest.

**Word count: 295**

**Key words:** Malaria in Pregnancy, Intermittent Preventive Treatment, Uptake, Policy, Zambia.

### Strengths and weakness

- Use of large dataset from the 2018 malaria in pregnancy (MIP) survey with a nationally representative sample reduced selection bias and increased external validity and generalisability of the findings .
- Use of multi-stage random sampling technique reduced selection bias and increased validity of the findings
- Inclusion into analysis only women of reproductive age who gave birth after the new IPTp-SP policy was introduced reduced information bias and increased internal validity of the study
- Use of secondary data limited the choice of variables to be included in the analysis
- Exclusion of participants with incomplete data could have reduced the power of the study

## Introduction

Globally, there are an estimated 247 million cases of malaria reported from 84 malaria-endemic countries, with the majority (95%) being reported from the world health organisation (WHO) African Region. Sub-Saharan Africa is disproportionately affected, accounting for an estimated 350 to 500 million cases, 1 to 3 million deaths, 10,000 maternal and 200,000 neonatal deaths per year [1,2]. With an estimated 125 million pregnant women being at risk of contracting malaria globally, malaria in pregnancy (MIP) remains an important preventable cause of adverse maternal, neonatal health outcomes worldwide [3-5]. Out of an estimated 50 million annual pregnancies in malaria-endemic countries around the world each year, more than 50% of these live in the tropical areas of Africa where there is a high transmission of *P. falciparum* [6,7].

Malaria is a parasitic disease caused by a protozoon of the genus *Plasmodium*. Although there are species of malaria that infect humans— *Plasmodium falciparum*, *P. malariae*, *P. ovale*, *P. vivax* and *P. knowlesi*— two main species, *P. falciparum* and *P. vivax*, pose the greatest risk and contribute to adverse outcomes. *P. falciparum* is the deadliest malaria parasite and the most prevalent on the African continent [7,8]. Malaria parasites contribute to adverse pregnancy and birth outcomes due to their preferential accumulation in placental intervillous spaces, putting pregnant women and their babies at an increased risk. MIP is associated with anaemia, miscarriage, premature birth, stillbirth, congenital infection, low birth weight (lbw), maternal, foetal and perinatal death; one in four women have evidence of placental infection at the time of delivery (7–9). Moreover, evidence from previous studies shows that lbw is associated with a marked increase in infant mortality, high rates of cognitive impairment, learning disability, and behavioural problems [9-12].

Zambia is a sub-Saharan African country with a high malaria burden with an approximate 5.2 million annual malaria cases and an estimated 200,000 pregnancies being at risk of malaria [13]. The Zambia National Malaria Elimination Centre (NMEC) in line with WHO strategic framework of malaria prevention and control during pregnancy has developed and is implementing an MIP policy which includes the provision of four or more doses of intermittent preventive treatment of malaria during pregnancy with sulfadoxine pyrimethamine (IPTp-SP) [14]. Other interventions are insecticide treated nets (ITNs), in-door residual spraying (IRS) and case management.

IPTp-SP and ITN interventions are being implemented as part of antenatal care (ANC) services [15] and involves administration of sulfadoxine pyrimethamine (SP) (comprising three tablets containing 500 mg/25 mg SP, giving the total required dosage of 1500 mg/75 mg SP) as direct observed therapy (DOT) to pregnant women. The first IPTp-SP dose is administered during the second trimester, 13-16 gestation

1  
2  
3 weeks, followed by monthly doses until delivery for at least four doses. ANC has been identified to provide  
4 a good platform for regular and close contact between pregnant women and skilled health personnel for  
5 improved service delivery and monitoring. Zambia follows the 2016 WHO ANC model which recommends  
6 a minimum of 8 ANC contacts with the first contact scheduled to take place in the first trimester, two  
7 contacts in the second trimester and five contacts scheduled in the third trimester [15, 16].  
8  
9

10  
11  
12 Administration of IPTp-SP is based on the assumption that every pregnant woman living in a high malaria  
13 transmission area has malaria parasites. The parasites live in blood or placenta, whether or not she has  
14 symptoms and signs of malaria [17,18]. Previous studies in Zambia and elsewhere have provided  
15 evidence on the effectiveness of IPTp-SP on improved maternal and new-born health outcomes. In  
16 Zambia, administration of two or more doses of IPTp-SP showed a decrease in low birthweight among  
17 paucigravid and multigravid women compared to one dose [19]. A study conducted in Mali [20] showed  
18 that addition of a third dose of IPTp-SP led to a reduced risk of placental malaria, low birth weight and  
19 preterm births in all gravidae, compared with the standard two dose regimen. A systematic review and  
20 meta-analysis on Intermittent preventive therapy for malaria during pregnancy using 2 vs 3 or more doses  
21 of sulfadoxine-pyrimethamine and risk of low birth weight in Africa by Kayentao and colleagues [21]  
22 showed that three or more doses were associated with a 3.3% reduction in low birth weight, 3.1%  
23 reduction in placental malaria and 1.4% reduction in moderate to severe maternal anaemia.  
24  
25  
26  
27  
28  
29  
30  
31  
32

33  
34 However, the 2018 MIS report [22] shows that the proportion of pregnant women receiving four or more  
35 doses of doses of IPTp-SP is low at 5%. The reasons for the low coverage of IPTp-SP are not clear.  
36 Limited studies have been conducted on the predictors of the uptake of four or more doses of SP in  
37 Zambia. The reasons for the low coverage of IPTp-SP are not clear. Limited studies have been  
38 conducted on the predictors of the uptake of four or more doses of SP in Zambia.  
39  
40  
41  
42

### 43 **Objectives**

44  
45 The aim of this study was to determine the prevalence and predictors of the uptake of four or more doses  
46 of IPTp-SP in Zambia. Information is required to inform policy and programming to improve uptake of SP  
47 in the country.  
48  
49

### 50 **Methods**

#### 51 **Study design**

52  
53  
54 The present study is a secondary analysis of the 2018 Malaria indicator survey done in Zambia. It was a  
55 cross section survey conducted from April to May, 2018. The survey is periodically done to assess the  
56 malaria burden and coverages of key malaria interventions such as vector control, parasite clearance,  
57  
58  
59  
60

1  
2  
3 health promotion, enhanced surveillance, monitoring, evaluation and research, health system capacity,  
4 financing and case management in the general population including MIP. The MIS 2018 was the latest  
5 comprehensive dataset that was representative of the whole country and readily accessible at the time  
6 of writing the manuscript.  
7  
8  
9

### 10 **Study site**

11  
12  
13 The study used the 2018 MIS survey data which covered all the ten provinces of Zambia, making it  
14 nationally representative. The country is divided into ten provinces that are further divided into districts.  
15 For statistical purposes, each district is subdivided into census supervisory areas (CSAs) which are in  
16 turn subdivided into enumeration areas (EAs). The listing of EAs has information on the number of  
17 households and the populations. Zambia is a sub-Saharan African country located in south-central Africa  
18 with a surface area of 752,614 square kilometres. Lusaka, the capital city, is located in the south-central  
19 part of the country [23]. The topography is characterised by a high plateau, river valleys, and water  
20 bodies. The country derives its name from the Zambezi River, which drains all but a small northern part  
21 of the country. It has a tropical climate with the rainy season occurring during October to April. The climate  
22 is suitable for mosquito breeding and malaria transmission takes place throughout the year but peaks  
23 during the rainy season [24,25]. Zambia's population as of 8th September 2022 was 19,610,769. The  
24 male population was 9,603,056 and the female population was 10,007,713 [26].  
25  
26  
27  
28  
29  
30  
31  
32  
33

### 34 **Study participants and procedures**

35  
36  
37 Study participants were women of reproductive age who participated in the 2018 MIS. The country  
38 conducts MIS surveys every two to three years to provide updates on malaria interventions and disease  
39 burden in the country. A total of 3, 686 women of reproductive age who gave birth in the past five years  
40 participated in the 2018 MIS. From this sample, a total of 1, 381 were included in our analysis.  
41  
42  
43  
44  
45

### 46 **Inclusion criteria.**

47  
48 To be included in the study, participants needed to be:

- 49  
50 • Pregnant women who were pregnant in the past two years and five months after the new 2016  
51 policy on the fourth dose IPTp-SP was implemented
- 52  
53 • All women aged between 15 to 49 years from all the ten provinces

54  
55 Women who did not give consent and those who did not complete the individual questionnaires were not  
56 included in the analysis.  
57

### 58 **Sample size estimation**

The study participants in the main survey were selected using a two-stage cluster sampling technique which are based on a nationally representative sample of 4,177 households from 179 standard enumeration areas (SEAs) randomly selected from all ten provinces. Based on these criteria, at least 2,176 households were required in the rural domain. For further details on the 2018 MIS sampling technique and sample size determination see the 2018 MIS published report by the Zambian ministry of health.

#### **Assumptions for the sample size determination were;**

- 95% confidence interval
- 80% power
- design effect of 2.50
- Z-score of 1.96
- 10% relative standard error
- Margin of error of 2%
- 20% adjustment for non-response

**The estimated minimum sample size in this study was determined by the formula below;**

$$n = \frac{z^2 \times p(1-p)(DEFF)}{d^2} = 1141 \quad (25)$$

Where: n is the calculated sample size, z =1.96 is the statistic that defines the level of confidence required, p=0.05 is a prevalence of uptake of IPTp-SP among pregnant women in Zambia, expressed as a proportion of that population

D=0.02 is the desired level of precision, DEFF=2.5 is the design effect [27].

#### **Variables**

The variables for the study were as follows:

- Outcome variable: uptake of four or more doses of IPTp-SP
- Predictor variables: sociodemographic variables (age, parity, place and province of residence, religion, educational level, wealth index)
- Basic knowledge about malaria
- Knowledge about malaria treatment

1  
2  
3 The predictor variables were selected based on thorough literature review. In this study uptake means  
4 receiving any dosage of SP during pregnancy, with each dose being given at least 1 month apart starting  
5 from the second trimester of gestation, until the time of delivery as directly observed therapy.  
6  
7

### 8 9 **Data sources and processing**

10  
11 The merged 2018 MIS dataset comprising women of reproductive age (15 to 49 years) was extracted  
12 into the Microsoft office excel sheet 2013 using the data extraction tool. We subset women 15 to 49 years  
13 of age who were eligible to complete the questionnaire. From the eligible women, we subsetting women  
14 who consented. Further, a subset of women who completed the questionnaire and delivered in 2016 or  
15 later (after the new IPTp policy) was done using the lubridate library in R Studio. This was determined by  
16 using the age of the youngest child (that is, if a child was less than 881 days).  
17  
18  
19  
20  
21  
22

### 23 **Statistical analysis**

24  
25 R-studio statistical software version 4.2.1. was used for all the analyses. Descriptive statistical analysis  
26 was carried out first on socio-demographics to obtain frequencies and proportions. The proportion of  
27 missing values on the outcome was calculated. The correlation among the predictor variables was  
28 explored. Thereafter, univariate logistic regression was carried out and explanatory variables whose p-  
29 values were less than 0.2 were presented in table 2. The estimators with a p-value level of 0.20 chose  
30 the adjusted estimate more frequently when confounding is present and so produced less bias than the  
31 estimators with a p-value level of 0.05 [28]. Then, a backward selection approach using stepwise method  
32 with a p-value of 0.2 threshold was used to select explanatory variables to be included in the multivariable  
33 logistic regression for further analysis of the association to obtain adjusted odds ratios. We also compared  
34 Akaike's Information Criteria (AIC), Bayesian Information Criteria (BIC) and Pseudo-R2 between the  
35 multivariable model which included all variables (full model) and the model after backward selection  
36 approach (reduced model) for model fit. To account for the differences in sampling probabilities across  
37 the clusters and strata, sample weighting was used to adjust for the cluster sampling design using "svy"  
38 function in R studio and "svyset" command to match the multistage cluster sampling design method.  
39 Results from univariable and multivariable analysis were presented as crude and adjusted odds ratios  
40 along with their 95% CIs, respectively (p-value <0.05).  
41  
42  
43  
44  
45  
46  
47  
48  
49  
50  
51  
52  
53  
54

55 The missing values were imputed using the multiple imputation by chain equation (MICE) methods. The  
56 study explored the proportions of missing values and compared the estimates from the full data models  
57  
58  
59  
60



1  
2  
3 and the imputed models to see whether there was an observed difference. The multiple imputation was  
4 carried on multivariable analysis only [28]  
5  
6  
7

## 8 **Patient and Public Involvement**

9  
10 The study design was determined by the research team. Participants and the public were not directly  
11 involved in the conceptualisation and design of the study. Selection of study participants for the 2018 MIS  
12 was done in collaboration with the provincial and district health managers. The public were involved in  
13 the participant recruitment for the primary survey. However, since the study used secondary data from  
14 the 2018 MIS, patients and the public were not directly involvement in the selection of the variables to be  
15 included in the analysis. Rather, the team from Levy Mwanawasa Medical university and National Malaria  
16 Elimination Centre decided and agreed on the variables to be included in the analysis. Consequently,  
17 permission for access to the dataset used for the analysis was granted by the National Malaria Elimination  
18 centre in consultation with the Ministry of Health. After analysis and report writing, the research team held  
19 a dissemination meeting and study findings were shared with key stakeholders, including the Levy  
20 Mwanawasa Medical University School of Public Health, Ministry of Health and Zambia National Public  
21 Health Institute. A final report was also written and shared with the funding organization.  
22  
23  
24  
25  
26  
27  
28  
29  
30  
31  
32

## 33 **Results**

### 34 **Participants**

35  
36 A summary of the recruitment algorithm of study participants is shown below. A total of 4044 women of  
37 reproductive age were eligible to complete the questionnaire. Out of these, 3, 686 (91%) completed the  
38 questionnaire; 358 (9%) did not provide consent and were excluded from the study. A total of 1,381  
39 (34%) participants comprising women who delivered after the new IPTp-SP policy was introduced were  
40 included into the final sample for analysis (**Supplementary figure 1**).  
41  
42  
43  
44  
45  
46

### 47 **Demographic characteristics of respondents**

48  
49 Majority (68.9%) of study participants were in the age group 15-29 years; almost one third (30.8%) were  
50 in the age group 30-44 years and 0.3% were aged above 45 years. Close to half (48.9%) had completed  
51 primary education, 28.2% had secondary school education and 2.8% had gone up to higher education.  
52 Most respondents (81.3%) lived in rural areas. With regard to province of residence, 19.1% were from  
53 Luapula, 18.0% from Eastern, 17.2% from Western and 4.1% from Copperbelt provinces. One fifth  
54 (21.9%) of the study participants were in lowest wealth tertile; 15.6% were in the middle tertile.  
55 Concerning religion, more than half (56.8%) of study participants were protestants followed by Catholics  
56  
57  
58  
59  
60

(22.2%); Muslims constituted 0.1% of the respondents. Majority (97.3%) attended ANC and most (92.5%) took less than four doses of IPTp-SP. Majority (71.3%) took three doses of IPTp-SP, 14.5% took two doses, 7.5% took IPTp-SP 4+ doses, 6.9% took only one dose. The proportions of IPTp-SP uptake increased from IPTp-SP 1 to IPTp-SP 3 and drastically dropped at IPTp-SP 4+. More than half (52.5%) of the study participants had three or more children and 22.2% had two children. Concerning knowledge on malaria prevention measures, most (76.4%) were knowledgeable and only 45.0% were exposed to media messages (Table 1).

**Table 1: Socio-demographic and clinical characteristics of the study participants (N=1381)**

| Variable               | N (%)       |
|------------------------|-------------|
| <b>Age(years)</b>      |             |
| 15-24                  | 678 (49.1)  |
| 25-34                  | 497 (36.0)  |
| 35+                    | 205 (14.8)  |
| Missing                | 1 (0.1)     |
| <b>Residence</b>       |             |
| Rural                  | 1123 (81.3) |
| Urban                  | 258 (18.7)  |
| <b>Province</b>        |             |
| Central                | 93 (6.7)    |
| Copperbelt             | 56 (4.1)    |
| Eastern                | 249 (18.0)  |
| Luapula                | 264 (19.1)  |
| Lusaka                 | 87 (6.3)    |
| Muchinga               | 95 (6.9)    |
| North-Western          | 90 (6.5)    |
| Northern               | 120 (8.7)   |
| Southern               | 90 (6.5)    |
| Western                | 237 (17.2)  |
| <b>Wealth tertile</b>  |             |
| Low                    | 578 (41.8)  |
| Middle                 | 302 (21.9)  |
| High                   | 501 (36.3)  |
| <b>Education level</b> |             |
| Primary                | 675 (48.9)  |
| Secondary+             | 428 (31.0)  |
| Missing                | 278 (20.1)  |
| <b>Religion</b>        |             |
| Christian              | 1092 (79.1) |
| Non-christian          | 289 (20.9)  |

|                                           |             |
|-------------------------------------------|-------------|
|                                           |             |
| <b>Parity</b>                             |             |
| 1                                         | 348 (25.2)  |
| 2                                         | 307 (22.2)  |
| 3+                                        | 725 (52.5)  |
| Missing                                   | 1 (0.1)     |
|                                           |             |
| <b>Got ANC</b>                            |             |
| Yes                                       | 1344 (97.3) |
| No                                        | 35 (2.5)    |
| Missing                                   | 2 (0.2)     |
|                                           |             |
| <b>IPTp-SP Uptake<sup>a</sup></b>         |             |
| 1                                         | 80 (6.9)    |
| 2                                         | 167 (14.3)  |
| 3                                         | 829 (71.3)  |
| 4+                                        | 87 (7.5)    |
|                                           |             |
| <b>Exposure to media message</b>          |             |
| No                                        | 759 (55.0)  |
| Yes                                       | 622 (45.0)  |
| Missing                                   |             |
|                                           |             |
| <b>Knowledge about Malaria prevention</b> |             |
| Not knowledgeable                         | 241 (17.5)  |
| Knowledgeable                             | 1055 (78.4) |
| Missing                                   | 85 (6.1)    |
|                                           |             |
| <b>Basic Malaria knowledge</b>            |             |
| Incorrect                                 | 351 (25.4)  |
| Correct                                   | 945 (68.4)  |
| Missing                                   | 85 (6.2)    |

<sup>a</sup> The proportions excludes the missing values

### **Predictors for the uptake of adequate doses of IPTp-SP (4+ doses)**

The overall uptake of adequate (4+) doses of IPTp-SP was 7.5%. The uptake of 4+ doses of IPTp-SP decreased by level of education ranging from 9.2% for women with primary education to 4.6% for women with higher education. The same trend was observed across age group, i.e. decrease from 8.5% in 15-24 years age group to 5.5% in age group of 35 and above years. The women from rural area had higher (7.6%) uptake of adequate doses compared to women from urban area (7.2 %). The uptake of adequate doses of SP was highest for women in the low wealth tertile (11.4 %). Also, women who were not exposed to media messages had higher uptake of SP (8.9%) compared to those who were exposed to media messages (5.9%) (Table 2).

1  
2  
3 The results of univariate logistic regression analysis (crude odds ratios) show that woman's education  
4 level, place of residence, province, wealth tertile, exposure to media messages and knowledge about  
5 malaria prevention were significantly associated with the adequate uptake of IPTp-SP. While age group  
6 showed no evidence of association with adequate uptake of IPTp-SP. The results in table 2 shows  
7 significant lower odds of taking an adequate IPTp-SP among women with at least secondary level of  
8 education (0.30, 95%CI 0.15-0.61, p-value=0.001) compared to those with primary level of education.  
9  
10 Luapula and Muchinga provinces show significant higher odds of taking an adequate IPTp-SP (13.57,  
11 95%CI 2.98-61.77, p-value=0.001 and 11.50, 95%CI 2.32-56.95, p-value=0.003, respectively) compared  
12 to those from Copperbelt. However, this may be due to chance given the low sample size in Copperbelt  
13 province which is a reference. This is evidenced by the wide 95% confidence interval, which increases  
14 uncertainty.

15  
16  
17  
18  
19  
20  
21  
22  
23 Women in the middle and high wealth tertile show significant lower odds of taking adequate IPTp-SP  
24 (0.35, 95%CI 0.17-0.72, p-value=0.005 and 0.10, 95%CI 0.10-0.20, p-value<0.001, respectively)  
25 compared to those in low wealth tertile. Women who were exposed to media messages had significant  
26 lower odds of taking an adequate IPTp-SP (0.49, 95%CI 0.28-0.85, p-value=0.011) compared to those  
27 who were not exposed. Women who had knowledge about malaria prevention had significant lower odds  
28 of taking an adequate IPTp-SP (0.44, 95%CI 0.23-0.86, p-value=0.016) compared to those who had  
29 none.

30  
31  
32  
33  
34  
35  
36 Using backward selection method with p-value threshold of 0.2, the reduced (final) model retained age  
37 group, education level, province and wealth quintile. Therefore, after adjusting for age group, education  
38 level and wealth quintile, Luapula and Muchinga provinces still showed significant higher (though  
39 reduced) odds of taking an adequate IPTp-SP (8.72, 95%CI 1.72-44.26, p-value=0.009 and 6.67, 95%CI  
40 1.19-37.47, p-value=0.031, respectively) compared to those from Copperbelt. And after adjusting for age  
41 group, education level and province, only women in the higher wealth tertile had significant lower odds  
42 of taking an adequate IPTp-SP (0.32, 95%CI 0.13-0.79, p-value=0.014) compared to those in low wealth  
43 tertile.

44  
45  
46  
47  
48  
49  
50 Comparing AIC, BIC and Pseudo-R2 we have 417.7, 490.2 and 0.09 for the reduced model, and 436.7,  
51 496.3 and 0.08 for the full model, respectively. This suggests that the reduced model is better fitted  
52 compared to the full model. This is because the AIC and BIC are lower, and Pseudo-R2 is higher for the  
53 reduced model compared to the full model. The proportion of missing values were highest under  
54 education level variable which accounted to 20.1%. Comparing estimates of full data model from  
55 multivariable analysis and the imputed multivariable analysis, there is no much difference in the estimates  
56  
57  
58  
59  
60

apart from the fact that the 95% CI are narrower in some instances in imputed model compared to full data model. However, estimates from multiple imputation are only valid when data is at least missing at random (Table 2).

**Table 2: Predictors for the adequate uptake of IPTp-SP ( $\geq 4$  doses) during pregnancy in Zambia**

| Variable                 | n(weighted) | n(%)     | cOR <sup>a</sup> | 95% CI <sup>b</sup> | p-value | aOR <sup>c</sup> | 95% CI     | P-value |
|--------------------------|-------------|----------|------------------|---------------------|---------|------------------|------------|---------|
| Overall                  | 1163        | 87 (7.5) |                  |                     |         |                  |            |         |
| <b>Age group (Years)</b> |             |          |                  |                     |         |                  |            |         |
| 15-24                    | 542         | 46 (8.5) | 1.00             |                     |         | 1.00             |            |         |
| 25-34                    | 441         | 31 (7.0) | 0.67             | 0.37-1.21           | 0.181   | 0.54             | 0.26-1.08  | 0.083   |
| 35+                      | 180         | 10 (5.5) | 0.58             | 0.24-1.35           | 0.202   | 0.58             | 0.23-1.51  | 0.266   |
| <b>**Education level</b> |             |          |                  |                     |         |                  |            |         |
| Primary                  | 542         | 50 (9.2) | 1.00             |                     |         | 1.00             |            |         |
| Secondary+               | 396         | 18 (4.6) | 0.30             | 0.15-0.61           | 0.001*  | 0.55             | 0.27-1.11  | 0.093   |
| <b>Residence</b>         |             |          |                  |                     |         |                  |            |         |
| Rural                    | 927         | 70 (7.6) | 1.00             |                     |         |                  |            |         |
| Urban                    | 219         | 17 (7.2) | 0.22             | 0.11-0.44           | <0.001* |                  |            |         |
| <b>Province</b>          |             |          |                  |                     |         |                  |            |         |
| Copperbelt               | 44          | 2 (4.6)  | 1.00             |                     |         | 1.00             |            |         |
| Central                  | 89          | 3 (3.4)  | 2.15             | 0.28-16.78          | 0.463   | 2.03             | 0.27-15.48 | 0.493   |
| Eastern                  | 210         | 11 (5.2) | 1.72             | 0.32-9.35           | 0.528   | 1.15             | 0.19-7.00  | 0.878   |
| Luapula                  | 196         | 36(18.4) | 13.5             | 2.98-61.77          | 0.001*  | 8.72             | 1.72-44.26 | 0.009*  |
| Lusaka                   | 70          | 0 (0.0)  | -                | -                   | -       | -                | -          | -       |
| Muchinga                 | 83          | 13(15.7) | 11.5             | 2.32-56.95          | 0.003*  | 6.67             | 1.19-37.47 | 0.031*  |

|                                             |     |          |      |            |         |      |            |        |
|---------------------------------------------|-----|----------|------|------------|---------|------|------------|--------|
| North-western                               | 84  | 4 (4.8)  | 2.32 | 0.38-14.08 | 0.359   | 2.08 | 0.32-13.34 | 0.441  |
| Northern                                    | 111 | 16(14.4) | 8.94 | 1.86-42.87 | 0.006   | 4.13 | 0.73-23.42 | 0.109  |
| Southern                                    | 80  | 1 (1.3)  | 0.82 | 0.07-9.59  | 0.873   | 1.40 | 0.11-17.90 | 0.794  |
| Western                                     | 196 | 1 (0.5)  | 0.53 | 0.05-6.13  | 0.608   | -    | -          | -      |
| <b>Wealth tertile</b>                       |     |          |      |            |         |      |            |        |
| Low                                         | 438 | 50(11.4) | 1.00 |            |         | 1.00 |            |        |
| Middle                                      | 259 | 16 (6.2) | 0.35 | 0.17-0.72  | 0.005*  | 0.52 | 0.19-1.45  | 0.212  |
| High                                        | 466 | 21 (4.5) | 0.10 | 0.10-0.20  | <0.001* | 0.32 | 0.13-0.79  | 0.014* |
| <b>Exposure to media messages</b>           |     |          |      |            |         |      |            |        |
| No                                          | 607 | 54 (8.9) | 1.00 |            |         |      |            |        |
| Yes                                         | 556 | 33 (5.9) | 0.49 | 0.28-0.85  | 0.011*  |      |            |        |
| <b>**Knowledge about malaria prevention</b> |     |          |      |            |         |      |            |        |
| Not knowledgeable                           | 180 | 22(12.2) | 1.00 |            |         |      |            |        |
| Knowledgeable                               | 920 | 60 (6.5) | 0.44 | 0.23-0.86  | 0.016*  |      |            |        |

<sup>a</sup>cOR stands for Crude Odds ratio <sup>b</sup>CI stands for Confidence interval <sup>c</sup>aOR stands for adjusted odds ratio  
 \*significant at 5% level \*\*The observations do not add up to the overall sample because the variables have missing values. Note: AIC, BIC and Pseudo-R2 are 417.7, 490.2 and 0.09 for the reduced model, and 436.7, 496.3 and 0.08 for the model which included all the variables (full model) in the table, respectively

## Discussion

The study aimed to determine the predictors of IPTp-SP uptake for four or more doses in Zambia. Our findings show that uptake of four or more doses of IPTp-SP was low at 7.5%. The place and province of residence were significantly associated with adequate uptake of IPTp-SP doses. Women who were residents of Luapula and Muchinga provinces had higher odds of taking adequate doses with reference

1  
2  
3 to those in the Copperbelt province. Conversely, women in the highest wealth tertile were significantly  
4 less likely to receive IPTp-SP 4+ doses compared to those in the lowest tertile.  
5  
6

7 Our findings show an association between IPTp-SP uptake and place of residence. Women from rural  
8 provinces such as Muchinga and Luapula showed higher odds of IPTp-SP uptake than those from urban  
9 provinces of Copperbelt and Lusaka. The observed variation in the odds of IPTp-SP uptake between the  
10 urban and rural provinces could be due to differences in the malaria prevalence among these provinces.  
11 For example, Luapula province has a high malaria prevalence of 63% compared to 3% in Lusaka and  
12 Southern provinces. The province is rural with many water bodies, enhancing malaria transmission.  
13 These factors also make malaria transmission likely to be longer and more intense compared to other  
14 provinces. Thus, the province continues to report the largest malaria burden in the country. Women in  
15 provinces with low prevalence of malaria may not take adequate IPTp-SP due to low perceived risk  
16 [29,30]. On the contrary, women from regions of high level of malaria transmission, may take adequate  
17 doses of IPTp-SP due to higher risk perception. In these regions, emphasis on SP uptake during  
18 awareness messages could be higher due to the higher risk of contracting malaria. This finding suggests  
19 that women in rural areas may consider themselves at higher risk of contracting malaria compared to  
20 those in urban areas. Exploratory studies are required to investigate the reasons for variations in uptake  
21 of IPTp-SP among different provinces. These findings corroborate those from studies conducted in  
22 Uganda [30] and Tanzania [31,32] which showed that variations in IPTp-SP uptake were related to  
23 differences in malaria transmission in the regions. The study in Tanzania showed that residents of the  
24 Central, Eastern, Southern, Lake regions, Southern highlands and Southwest highlands were  
25 significantly associated with the optimal uptake of SP doses compared to the residents of Zanzibar and  
26 Northern zones where malaria transmission was low. Similarly, the Uganda study showed that pregnant  
27 women residing in Eastern and Coastal regions had higher odds of optimal uptake of SP.  
28  
29  
30  
31  
32  
33  
34  
35  
36  
37  
38  
39  
40  
41  
42  
43

44 Our findings show that participants who had knowledge about malaria prevention and exposure to media  
45 messages had less odds of receiving adequate IPTp-SP doses. These findings contradict the study  
46 conducted by Muntayi et al [33] which showed that maternal knowledge on IPTp-SP positively influenced  
47 the uptake of the intervention in Tanzania, Cameroon, Zambia and Ghana. The difference between these  
48 findings and the current study could be that our study did not assess specifically the knowledge about  
49 IPTp-SP and its benefits. Rather, the study focused on knowledge about malaria prevention in general.  
50 This calls for more awareness on malaria interventions in general and about the recommended doses of  
51 IPTp-SP during pregnancy.  
52  
53  
54  
55  
56  
57  
58  
59  
60

1  
2  
3 Moreover, our findings showed no significant association between education level and uptake of IPTp-  
4 SP. However, unadjusted analysis showed that women who had secondary level education and above  
5 had less odds of taking four or more doses of IPTp-SP compared with those who attained primary  
6 education. Our findings contrast previous studies and surveys. Literally, one would expect that having  
7 secondary educational level or higher may be of influence on the uptake of the recommended doses of  
8 IPTp-SP compared to women with a lower education level. A study which compared MIS results of 12  
9 countries in sub-Saharan Africa [34] found that women with higher education had higher odds of reporting  
10 receiving three or more doses of IPTp-SP. The differences in the findings could be as a result of using  
11 different methods. It could also be due to selection bias; a large proportion of our study participants were  
12 those with primary level education who mainly resided in rural areas.

13  
14  
15 This study found that women in the highest and middle wealth tertile had less odds of taking four or more  
16 doses of IPTp-SP compared to those in the lowest wealth quintile. This finding contradicts previous  
17 studies [35,36] which revealed that wealth index has a significant effect on uptake of IPTp-SP. These  
18 studies showed that the chances of completing the recommended dose of IPTp-SP increased with  
19 increase in wealth index [36]. For example, a study conducted in Senegal found that women in richer or  
20 middle wealth tertile were more likely to use the recommended doses of IPTp-SP [36]. The reason for  
21 the difference between our findings and these studies could be due to confounding by place of residence.  
22 Our findings show that most study participants who took four or more doses of IPTp-SP were from the  
23 rural areas who are mostly in the low wealth tertile. The other reason could be the fact that IPTp-SP is  
24 provided for free in Zambia.

25  
26  
27 There was no significant associations noted between age and taking four or more doses of IPTp-SP.  
28 However, the adjusted analysis showed that, compared to the youthful mothers (15 to 24 years), those  
29 aged between 25 and 34 years were less likely to take four or more doses of IPTp-SP. This finding  
30 contradicts previous studies [36,37] which revealed that younger women are less likely to use health  
31 services due to inadequate access to information and communication channels used for IPTp-SP  
32 promotion which are necessary for the uptake of IPTp-SP. For example, a study conducted in Ghana [37]  
33 reported low uptake of the recommended dose of IPTp-SP among the youth. Many youth often hide  
34 their pregnancies and start their ANC late, when they cannot take the recommended doses before  
35 delivery.

36  
37  
38 This study further reports that the uptake of four or more doses of IPTp-SP during pregnancy is still low  
39 at 7.5%. Most women (71.3%) took up to the third dose of IPTp-SP during pregnancy. This finding could  
40 be due to lack of awareness about the new guidelines on the fourth dose. More emphasis is needed on  
41  
42  
43  
44  
45  
46  
47  
48  
49  
50  
51  
52  
53  
54  
55  
56  
57  
58  
59  
60



1  
2  
3 the new guidelines and taking at least three or more doses of IPTp-SP. Health messages should focus  
4 on and emphasise the new policy on four or more doses in the country. This finding is similar to other  
5 studies in sub-Saharan Africa which reported low uptake of the recommended doses of IPTp-SP [38] and  
6 suggests an urgent need for strategies to increase IPTp-SP coverage for improved maternal and newborn  
7 health outcomes in the region. This may contribute to the achievement of the ambitious sustainable  
8 development goals (SDG) and the target of reducing maternal mortality rate (MMR) from 319 to 70 per  
9 100,000 live births [38-44].  
10  
11  
12  
13  
14  
15  
16  
17

### 18 **Study limitations**

19  
20 This study has potential limitations. First, we did not collect the data, but used secondary data from the  
21 2018 MIS. This prevented the team from having any control over the measurement and selection of the  
22 variables. Some important variables that would have been of interest such as distance from the health  
23 facility to the communities where people live, stocks of SP, timing of ANC and number of times the woman  
24 attended ANC were not contained in the data set and thus could not be analysed. Further, the MIS data  
25 were cross-sectional, the associations in this study cannot guarantee any causation or directionality.  
26  
27  
28  
29

30  
31 Despite these limitations, we believe our findings have provided important information on the low  
32 coverage of four or more doses of IPTp-SP and the associated factors. In addition, use of a nationally  
33 representative data from the 2018 MIS that covered all the provinces increases the generalisability of our  
34 findings.  
35  
36  
37  
38

### 39 **Conclusion**

40  
41 These findings confirm low uptake of four or more doses of IPTp-SP in Zambia at 7.5% and that province  
42 and place of residence and wealth tertile affect IPTp-SP uptake. Strategies and interventions should  
43 focus on increased coverage of IPTp-SP from the current very low levels, with emphasis on provinces  
44 with much higher malaria burden where the risk is greatest and the ability to afford health care lowest.  
45 Interventions should include dissemination messages on the new policy of four or more doses of IPTp-  
46 SP and the benefits of strengthening the linkage between IPTp-SP program with ANC services.  
47  
48  
49  
50  
51  
52  
53

### 54 **Figure Legend/Caption**

55  
56 Figure 1 : Participant recruitment algorithm  
57  
58

### 59 **Authors' Contribution**

1  
2  
3 DS, CS, and NM contributed to the conception of the study and literature search. DS conducted the  
4 extraction, analysis and drafted the manuscript. CS, NM, BH LSM and HM contributed to the coordination  
5 study activities. CS, NM, BH contributed to the revision of the manuscript. All authors read and approved  
6 the manuscript.  
7  
8  
9

## 10 **Funding Statement**

11  
12  
13 Presidential Malaria Initiative and Centres for Disease Prevention and Control  
14

## 15 **Competing Interests**

16  
17  
18 All authors declare that they have no conflicting interests in this work  
19

## 20 ***Ethics approval***

21  
22  
23 Ethical approval and waiver of consent was given by ERES converge IRB (Ref No. 2021-Nov-004).  
24 Permission to conduct the study and access to the 2018 MIS dataset was granted by the National Health  
25 Research Authority (NRFA) Ref No. NHRA000023/04/03/2022) and Ministry of Health, respectively. The  
26 dataset was then secured as soft copy in the computer. No information regarding names of study  
27 participants was obtained and used; the dataset was only used for the purpose of this study and it was  
28 not given to any other person or organization. No harm was inflicted to the participants, the study used  
29 secondary data and there was no direct contact with study participants.  
30  
31  
32  
33  
34

## 35 **Data Sharing**

36  
37 Data are available upon reasonable request from the corresponding author and with permission of the  
38 ERES ethics review board.  
39  
40  
41

## 42 **Costs and payments**

43  
44 N/A  
45

## 46 **Acknowledgements**

47  
48 We thank Lusaka District Health Management Team who provided field research assistants and study  
49 participants.  
50  
51

## 52 **Acknowledgements**

53  
54 We thank the Field Epidemiology Training Program staff from Levy Mwanawasa Medical University,  
55 School of Public Health for their support; Prof Victor Mukonk, Dean School of Public Health for facilitating  
56 the MSc. Field Epidemiology program at the university; Ms Heilmann Elizabeth Susan for her support in  
57 R studio; US CDC staff and Dr Paul Pyschus for their invaluable support during the development of this  
58  
59  
60

1  
2  
3 research idea. Special thanks go to the National Malaria Elimination Centre management for granting  
4 access to the Malaria Indicator Survey (MIS) dataset.  
5  
6

## 7 8 9 10 11 12 13 14 15 16 17 18 19 20 21 22 23 24 25 26 27 28 29 30 31 32 33 34 35 36 37 38 39 40 41 42 43 44 45 46 47 48 49 50 51 52 53 54 55 56 57 58 59 60

### References

1. WHO, 2023. Malaria. Available at: [Malaria \(who.int\)](#), accessed on 10<sup>th</sup> April, 2023
2. WHO, 2021. World malaria report 2020: 20 years of global progress and challenges. Available at: [World malaria report 2020: 20 years of global progress and challenges \(who.int\)](#), accessed on 10<sup>th</sup> April, 2023
3. WHO, 2023. Malaria. Available at: [Malaria \(who.int\)](#), accessed on 10<sup>th</sup> April, 2023
4. WHO, 2023. World malaria report 2020: Tracking progress and gaps in the global response to malaria. Available at: [World malaria report 2022 \(who.int\)](#), accessed on 10<sup>th</sup> April, 2023
5. Bauserman M, Conroy AL, North K, Patterson J, Bose C, Meshnick S. An overview of malaria in pregnancy. *Semin Perinatol*, 2019;43(5):282-290. doi: 10.1053/j.semperi.2019.03.018.
6. Dellicour S, Tatem AJ, Guerra CA, Snow RW, Kuile FO. Quantifying the number of pregnancies at risk of malaria in 2007: A demographic study. *PLoS Med* [Internet]. 2010;7. Available from: <https://doi.org/10.1371/journal.pmed.1000221>
7. Gnémé A, Guelbéogo WM, Riehle MM, Tiono AB, Diarra A, Kabré GB, et al. Plasmodium species occurrence, temporal distribution and interaction in a child-aged population in rural Burkina Faso. *Malar J*. 2013 Feb 19;12:67.
8. Desai M, ter Kuile FO, Nosten F, McGready R, Asamoah K, Brabin B, et al. Epidemiology and burden of malaria in pregnancy. *Lancet Infect Dis*. 2007 Feb;7(2):93–104.
9. Greenwood AM, Armstrong JR, Byass P, Snow RW, Greenwood BM. Malaria chemoprophylaxis, birth weight and child survival. *Trans R Soc Trop Med Hyg*. 1992;86(5):483–5.
10. Steketee RW, Nahlen BL, Parise ME, Menendez C. The burden of malaria in pregnancy in malaria-endemic areas. *Am J Trop Med Hyg*. 2001;64(1-2 Suppl):28–35.

- 1  
2  
3  
4  
5  
6  
7  
8  
9  
10  
11  
12  
13  
14  
15  
16  
17  
18  
19  
20  
21  
22  
23  
24  
25  
26  
27  
28  
29  
30  
31  
32  
33  
34  
35  
36  
37  
38  
39  
40  
41  
42  
43  
44  
45  
46  
47  
48  
49  
50  
51  
52  
53  
54  
55  
56  
57  
58  
59  
60
11. Corbett SS, Drewett RF. To what extent is failure to thrive in infancy associated with poorer cognitive development? A review and meta-analysis. *J Child Psychol Psychiatry*. 2004 Mar;45(3):641-54. doi: 10.1111/j.1469-7610.2004.00253.x. PMID: 15055382
  12. Agarwal P, Lim SB. Long-term follow-up and outcome of extremely-low-birth-weight (ELBW) infants. *Ann Acad Med Singapore*. 2003 May;32(3):346–53.
  13. Mace KE, Chalwe V, Katalenich BL, Nambozi M, Mubikayi L, Mulele CK, et al. Evaluation of sulphadoxine-pyrimethamine for intermittent preventive treatment of malaria in pregnancy: a retrospective birth outcomes study in Mansa, Zambia. *Malar J*. 2015 Feb 7;14(1):69
  14. Chaponda EB, Chandramohan D, Michelo C, Mharakurwa S, Chipeta J, Chico RM. High burden of malaria infection in pregnant women in a rural district of Zambia: a cross-sectional study. *Malar J* [Internet]. 2015 Sep 30 [cited 2021 Jan 9];14. Available from: <https://www.ncbi.nlm.nih.gov/pmc/articles/PMC4590700/>
  15. Zambia National Malaria Elimination Centre, 2017. National Malaria Elimination Strategic Plan 2017-2021. Available at: [Malaria Elimination Strategy — Zambia National Malaria Elimination Centre \(nmec.org.zm\)](http://www.nmec.org.zm), accessed on 12<sup>th</sup> April, 2023
  16. Ministry of Health, 2018. ANC guidelines for a positive pregnancy experience. Available at: [ANC guidelines for a positive pregnancy experience | WHO | Regional Office for Africa](http://www.who.int/region/africa/publications/anc-guidelines-for-a-positive-pregnancy-experience), accessed on 13<sup>th</sup> April, 2023
  17. Sialubanje, C., Kaiser, J.L., Ngoma, T. et al. Postnatal care services in rural Zambia: a qualitative exploration of user, provider, and community perspectives on quality of care. *BMC Pregnancy Childbirth* 23, 39 (2023). <https://doi.org/10.1186/s12884-023-05350-w>
  18. Sikambale C, Halwindi H, Baboo KS. Factors Influencing Utilization of Intermittent Presumptive Treatment of Malaria (IPTp) Services by Pregnant Women in Sesheke District of Western Province Zambia. *Med J Zambia*. 2013;40(1):24–32.
  19. Zakama AK, Ozarlan N, Gaw SL. Placental Malaria. *Curr Trop Med Rep*. 2020;7(4):162-171. doi: 10.1007/s40475-020-00213-2.

- 1  
2  
3 19. Mace KE, Chalwe V, Katalenich BL, Nambozi M, Mubikayi L, Mulele CK, et al. Evaluation of  
4 sulphadoxine-pyrimethamine for intermittent preventive treatment of malaria in pregnancy: a  
5 retrospective birth outcomes study in Mansa, Zambia. *Malar J.* 2015 ;14(1):69.  
6  
7
- 8  
9 20. Diakite OS, Kayentao K, Traoré BT, Djimde A, Traoré B, Diallo M. Superiority of 3 over 2 doses  
10 of intermittent preventive treatment with sulfadoxine-pyrimethamine for the prevention of  
11 malaria during pregnancy in Mali: A randomized controlled trial. *Clin Infect Dis.* 2011;53(3):215-  
12 23. doi: 10.1093/cid/cir374.  
13  
14
- 15 21. Kayentao K, Garner P, van Eijk AM, Naidoo I, Roper C, Mulokozi A, MacArthur JR, Luntamo M,  
16 Ashorn P, Doumbo OK, ter Kuile FO. Intermittent preventive therapy for malaria during  
17 pregnancy using 2 vs 3 or more doses of sulfadoxine-pyrimethamine and risk of low birth weight  
18 in Africa: systematic review and meta-analysis. *JAMA.* 2013; 309(6):594-604. doi:  
19 10.1001/jama.2012.216231.  
20  
21
- 22 22. Ministry of Health, Central Statistics Office, PATH, PMI USAID, CDC, UNICEF, and WHO, 2018.  
23 MIS 2018: Zambia Malaria Indicator Survey 2018. Available at:  
24 [https://www.malariasurveys.org/documents/Zambia\\_MIS2018\\_FINAL-withSigs\\_20190415.pdf](https://www.malariasurveys.org/documents/Zambia_MIS2018_FINAL-withSigs_20190415.pdf),  
25 accessed on 10<sup>th</sup> April, 2023  
26  
27
- 28 23. Central Statistical Office (Zambia), ICF International, Ministry of Health (Zambia), University  
29 Teaching Hospital (Zambia), University of Zambia. Zambia Demographic and Health Survey  
30 2018-2019. Fairfax, United States of America: ICF International, 2020. Available at: [Zambia  
31 Demographic and Health Survey 2018-2019 | GHDX \(healthdata.org\)](https://ghdx.healthdata.org/zambia-demographic-and-health-survey-2018-2019)  
32  
33
- 34 24. US President's Malaria Initiative (PMI), 2022. Zambia. Available at: [Zambia - PMI](https://www.pmi.gov/zambia), accessed on  
35 14<sup>th</sup> April, 2023  
36  
37
- 38 25. Riedel N, Vounatsou P, Miller JM, Gosoni L, Chizema-Kawesha E, Mukonka V, et al.  
39 Geographical patterns and predictors of malaria risk in Zambia: Bayesian geostatistical modelling  
40 of the 2006 Zambia national malaria indicator survey (ZMIS). *Malar J.* 2010;9(1).  
41  
42
- 43 26. Zambia Statistics Agency, 2022. 2022 Census. Available at: [https://www.zamstats.gov.zm/2022-  
44 census/](https://www.zamstats.gov.zm/2022-census/), accessed on 14<sup>th</sup> April, 2023  
45  
46
- 47 27. Pourhoseingholi MA, Vahedi M, Rahimzadeh M. Sample size calculation in medical studies.  
48 *Gastroenterol Hepatol Bed Bench,* 2013; 6(1):14–7.  
49  
50  
51  
52  
53  
54  
55  
56  
57  
58  
59  
60

- 1  
2  
3 28. Rubin DB. Inference and Missing Data. *Biometrika*. 1976;63(3):581–592.  
4 <https://doi.org/10.1093/biomet/63.3.581>  
5  
6  
7  
8 29. Okoli CI, Hajizadeh M, Rahman MM, Khanam R. Decomposition of socioeconomic inequalities  
9 in the uptake of intermittent preventive treatment of malaria in pregnancy in Nigeria: evidence  
10 from Demographic Health Survey. *Malar J*. 2021;20:300  
11  
12  
13 30. Okethwangu D, Opigo J, Atugonza S, Kizza CT, Nabatanzi M, Biribawa C, et al. Factors  
14 associated with uptake of optimal doses of intermittent preventive treatment for malaria among  
15 pregnant women in Uganda: analysis of data from the Uganda Demographic and Health Survey,  
16 2016. *Malar J*. 2019; 18(1):250.  
17  
18  
19  
20  
21 31. Mchwampaka WM, Tarimo D, Chacky F, Mohamed A, Kishimba R and Smwel A. Factors  
22 affecting uptake of  $\geq 3$  doses of Sulfadoxine-Pyrimethamine for malaria prevention in  
23 pregnancy in selected health facilities, Arusha region, Tanzania. *BMC Pregnancy Childbirth*,  
24 2019; 440 <https://doi.org/10.1186/s12884-019-2592-0>  
25  
26  
27  
28  
29 32. Gross, K., Alba, S., Glass, T.R. et al. Timing of antenatal care for adolescent and adult  
30 pregnant women in south-eastern Tanzania. *BMC Pregnancy Childbirth* 2012; 16.  
31 <https://doi.org/10.1186/1471-2393-12-16>  
32  
33  
34  
35 33. Mutanyi JA, Onguru DO, Ogolla SO, Adipo LB. Determinants of the uptake of intermittent  
36 preventive treatment of malaria in pregnancy with sulphadoxine pyrimethamine in Sabatia Sub  
37 County, Western Kenya. *Infect Dis Poverty*. 2021;10:106.  
38  
39  
40  
41 34. Darteh EKM, Dickson KS, Ahinkorah BO, Owusu BA, Okyere J, Salihu T et al. Factors influencing  
42 the uptake of intermittent preventive treatment among pregnant women in sub-Saharan Africa: a  
43 multilevel analysis. *Arch Public Health*. 2021;79(1):182. doi: 10.1186/s13690-021-00707-z.  
44  
45  
46  
47 35. Burger R. School effectiveness in Zambia: The origins of differences between rural and urban  
48 outcomes. *Dev South Afr*. 2011 Jun 1;28:157–76.  
49  
50  
51 36. Mbengue MAS, Bei AK, Mboup A, Ahouidi A, Sarr M, Mboup S, et al. Factors influencing the use  
52 of malaria prevention strategies by women in Senegal: a cross-sectional study. *Malar J*. 2017;  
53 16:470.  
54  
55  
56  
57  
58  
59  
60

- 1  
2  
3  
4  
5  
6  
7  
8  
9  
10  
11  
12  
13  
14  
15  
16  
17  
18  
19  
20  
21  
22  
23  
24  
25  
26  
27  
28  
29  
30  
31  
32  
33  
34  
35  
36  
37  
38  
39  
40  
41  
42  
43  
44  
45  
46  
47  
48  
49  
50  
51  
52  
53  
54  
55  
56  
57  
58  
59  
60
37. Ayiisi EA. Knowledge and Utilization of Intermittent Preventive Treatment (IPT) for Malaria Control Among Pregnant Women Attending Antenatal Clinics in the Sunyani West District of Ghana. *Sci J Public Health*. 2017; 5(3):254.
  38. Odjidja EN, Kwanin C, Saha M. Low Uptake of Intermittent Preventive Treatment in Ghana; An Examination of Health System Bottlenecks. *Health Syst Policy Res*. 4(3):0–0.
  39. Dun-Dery F, Meissner P, Beiersmann C, Kuunibe N, Winkler V, Albrecht J, Müller O. Uptake challenges of intermittent preventive malaria therapy among pregnant women and their health care providers in the Upper West Region of Ghana: A mixed-methods study. *Parasite Epidemiol Control*;15:e00222. doi: 10.1016/j.parepi.2021.e00222.
  40. Blystad A, Moland KM, Munsaka E, Sandøy I, Zulu J. Vanilla biscuits and lobola bride wealth: parallel discourses on early pregnancy and schooling in rural Zambia. *BMC Public Health*. 2020;20(1):1485.
  41. Massar, K., Sialubanje, C., Maltagliati, I., & Ruiter, R. A. C. (2018). Exploring the perceived effectiveness of applied theater as a maternal health promotion tool in rural Zambia. *Qualitative Health Research*, 28(12), 1933–1943. <https://doi.org/10.1177/1049732318794207>
  42. Sialubanje C, Sitali DC, Mukumbuta N, Liyali L, Sumbwa PI, Kamboyi HK et al. Perspectives on factors influencing transmission of COVID-19 in Zambia: a qualitative study of health workers and community members. *BMJ Open* 2022;12:e057589. doi: 10.1136/bmjopen-2021-057589
  43. Sialubanje C, Mukumbuta N, Ng'andu M, Sumani EM, Nkonkomalimba M, Lyatumba DEM et al. Perspectives on the COVID-19 vaccine uptake: a qualitative study of community members and health workers in Zambia. *BMJ Open* 2022;12:e058028. doi: 10.1136/bmjopen-2021-058028
  44. Sialubanje C, Kaiser JL, Ngoma T, Mwananyanda L, Fong RM, Hamer DH, Scott NA. Postnatal care services in rural Zambia: a qualitative exploration of user, provider, and community perspectives on quality of care. *BMC pregnancy and childbirth*. 2023;23(1):39.

1  
2  
3  
4  
5  
6  
7  
8  
9  
10  
11  
12  
13  
14  
15  
16  
17  
18  
19  
20  
21  
22  
23  
24  
25  
26  
27  
28  
29  
30  
31  
32  
33  
34  
35  
36  
37  
38  
39  
40  
41  
42  
43  
44  
45  
46  
47  
48  
49  
50  
51  
52  
53  
54  
55  
56  
57  
58  
59  
60

For peer review only



1  
2  
3 **Figure 1: Participant recruitment algorithm**  
4  
5  
6

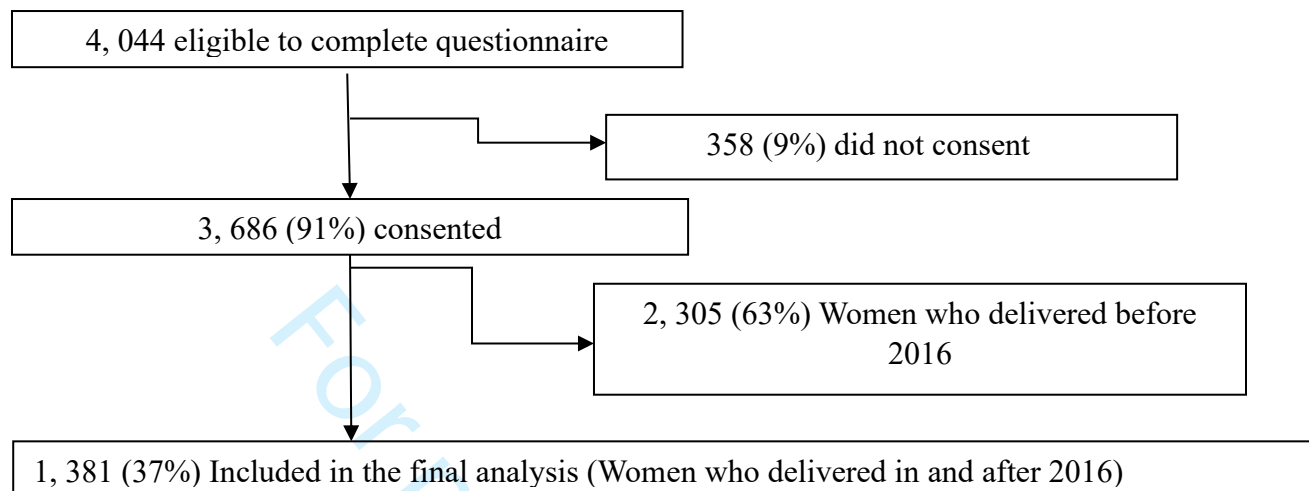

**STROBE Statement—Checklist of items that should be included in reports of descriptive studies**

| Item                           | Recommendation                                                                                                                                                                                                                                                                                     | Page |
|--------------------------------|----------------------------------------------------------------------------------------------------------------------------------------------------------------------------------------------------------------------------------------------------------------------------------------------------|------|
| Title and abstract             | Indicate the study's design with a commonly used term in the title or the abstract                                                                                                                                                                                                                 | 1    |
|                                | Provide in the abstract an informative and balanced summary of what was done and what was found                                                                                                                                                                                                    | 2    |
| Introduction                   |                                                                                                                                                                                                                                                                                                    |      |
| Background/rationale           | Explain the scientific background and rationale for the investigation being reported                                                                                                                                                                                                               | 4    |
| Objectives                     | State specific objectives, including any pre-specified hypotheses                                                                                                                                                                                                                                  | 5    |
| Methods                        |                                                                                                                                                                                                                                                                                                    |      |
| Study design                   | Present key elements of study design early in the paper                                                                                                                                                                                                                                            | 5    |
| Setting                        | Describe the setting, locations, and relevant dates, including periods of recruitment, exposure, follow-up, and data collection                                                                                                                                                                    | 6    |
| Participants                   | Give the eligibility criteria, and the sources and methods of selection of participants. Describe methods of follow-up                                                                                                                                                                             | 6    |
| Study size                     | Explain how the study size was arrived at                                                                                                                                                                                                                                                          | 7    |
| Variables                      | Clearly define all outcomes, exposures, predictors, potential confounders, and effect modifiers. Give diagnostic criteria, if applicable                                                                                                                                                           | 7    |
| Data sources/ measurement      | For each variable of interest, give sources of data and details of methods of assessment (measurement). Describe comparability of assessment methods if there is more than one group                                                                                                               | 8    |
|                                |                                                                                                                                                                                                                                                                                                    |      |
| Statistical methods            | Describe all statistical methods, including those used to control for confounding                                                                                                                                                                                                                  | 8    |
|                                | If applicable, explain how loss to follow-up was addressed                                                                                                                                                                                                                                         |      |
| Patient and public involvement |                                                                                                                                                                                                                                                                                                    | 8    |
| Results                        |                                                                                                                                                                                                                                                                                                    |      |
| Participants                   | Report numbers of individuals at each stage of study—eg numbers potentially eligible, examined for eligibility, confirmed eligible, included in the study, completing follow-up, and analysed (b) Give reasons for non-participation at each stage Participants (c) Consider use of a flow diagram | 9    |
| Descriptive statistics         | (a) Give characteristics of study participants (eg demographic, clinical, social) and information on exposures and potential confounders<br>Descriptive data<br>(b) Indicate number of participants with missing data for each variable of interest                                                | 9    |
| Main results                   |                                                                                                                                                                                                                                                                                                    | 10   |
| Discussion                     |                                                                                                                                                                                                                                                                                                    | 14   |

|             |  |    |
|-------------|--|----|
| Limitations |  | 16 |
| Conclusion  |  | 17 |
| References  |  | 18 |

For peer review only

# BMJ Open

## Uptake of Four or More Doses of Sulfadoxine Pyrimethamine for Intermittent Preventive Treatment of Malaria during Pregnancy in Zambia: Findings from the 2018 Malaria in Pregnancy Survey

|                                 |                                                                                                                                                                                                                                                                                                                                                                                                                                                                                                                                                                               |
|---------------------------------|-------------------------------------------------------------------------------------------------------------------------------------------------------------------------------------------------------------------------------------------------------------------------------------------------------------------------------------------------------------------------------------------------------------------------------------------------------------------------------------------------------------------------------------------------------------------------------|
| Journal:                        | <i>BMJ Open</i>                                                                                                                                                                                                                                                                                                                                                                                                                                                                                                                                                               |
| Manuscript ID                   | bmjopen-2023-073287.R2                                                                                                                                                                                                                                                                                                                                                                                                                                                                                                                                                        |
| Article Type:                   | Original research                                                                                                                                                                                                                                                                                                                                                                                                                                                                                                                                                             |
| Date Submitted by the Author:   | 13-May-2023                                                                                                                                                                                                                                                                                                                                                                                                                                                                                                                                                                   |
| Complete List of Authors:       | Sinyange, Danny; Levy Mwanawasa Medical University, School of Public Health; Zambia National Public Health Institute, Zambia Field Epidemiology Training Program<br>Mukumbuta, Nawa; Levy Mwanawasa Medical University, School of Public Health; Stellenbosch University, Public Health<br>Mutale, Lwito; Zambia National Public Health Institute<br>Mumbole, Hudson; Zambia Ministry of Health, ZAMBART<br>Hainza, Busiku ; Zambia Ministry of Health, National Malaria Elimination Centre<br>Sialubanje, Cephas; Levy Mwanawasa Medical University, School of Public Health |
| <b>Primary Subject Heading</b>: | Epidemiology                                                                                                                                                                                                                                                                                                                                                                                                                                                                                                                                                                  |
| Secondary Subject Heading:      | Obstetrics and gynaecology, Health services research, Epidemiology, Public health                                                                                                                                                                                                                                                                                                                                                                                                                                                                                             |
| Keywords:                       | EPIDEMIOLOGY, Health Services Accessibility, PUBLIC HEALTH, Maternal medicine < OBSTETRICS                                                                                                                                                                                                                                                                                                                                                                                                                                                                                    |
|                                 |                                                                                                                                                                                                                                                                                                                                                                                                                                                                                                                                                                               |

SCHOLARONE™  
Manuscripts



I, the Submitting Author has the right to grant and does grant on behalf of all authors of the Work (as defined in the below author licence), an exclusive licence and/or a non-exclusive licence for contributions from authors who are: i) UK Crown employees; ii) where BMJ has agreed a CC-BY licence shall apply, and/or iii) in accordance with the terms applicable for US Federal Government officers or employees acting as part of their official duties; on a worldwide, perpetual, irrevocable, royalty-free basis to BMJ Publishing Group Ltd ("BMJ") its licensees and where the relevant Journal is co-owned by BMJ to the co-owners of the Journal, to publish the Work in this journal and any other BMJ products and to exploit all rights, as set out in our [licence](#).

The Submitting Author accepts and understands that any supply made under these terms is made by BMJ to the Submitting Author unless you are acting as an employee on behalf of your employer or a postgraduate student of an affiliated institution which is paying any applicable article publishing charge ("APC") for Open Access articles. Where the Submitting Author wishes to make the Work available on an Open Access basis (and intends to pay the relevant APC), the terms of reuse of such Open Access shall be governed by a Creative Commons licence – details of these licences and which [Creative Commons](#) licence will apply to this Work are set out in our licence referred to above.

Other than as permitted in any relevant BMJ Author's Self Archiving Policies, I confirm this Work has not been accepted for publication elsewhere, is not being considered for publication elsewhere and does not duplicate material already published. I confirm all authors consent to publication of this Work and authorise the granting of this licence.

1  
2  
3 **Uptake of Four or More Doses of Sulfadoxine Pyrimethamine for Intermittent Preventive**  
4 **Treatment of Malaria during Pregnancy in Zambia: Findings from the 2018 Malaria in Pregnancy**  
5 **Survey**  
6  
7  
8  
9

10  
11 Danny Sinyange<sup>1,2</sup>, Nawa Mukumbuta<sup>1</sup>, Lwito Salifya Mutale<sup>2</sup>, Hudson Mumbole<sup>4</sup>, Busiku Hamainza<sup>4</sup>,  
12 Cephass Sialubanje<sup>1</sup>  
13  
14  
15  
16  
17

18 **Affiliations**  
19

- 20 1. School of Public Health, Levy Mwanawasa Medical University, Lusaka, Zambia
- 21 2. Zambia National Public Health Institute, Zambia Field Epidemiology Training Program, Lusaka,  
22 Zambia
- 23 3. ZAMBART, Ministry of Health, Lusaka, Zambia
- 24 4. Ministry of Health, National Malaria Elimination Centre, Lusaka, Zambia
- 25
- 26
- 27
- 28
- 29
- 30
- 31
- 32

33 **Corresponding author:** Sialubanje Cephass  
34

35 Email: csialubanje@yahoo.com  
36  
37  
38  
39  
40  
41  
42  
43  
44  
45  
46  
47  
48  
49  
50  
51  
52  
53  
54  
55  
56  
57  
58  
59  
60

## Abstract

**Objective:** To determine the prevalence and predictors of the uptake of four or more doses of sulfadoxine pyrimethamine (IPTp-SP 4+) in Zambia.

**Design:** A cross-sectional study using secondary data from the malaria in pregnancy survey (MIS) dataset conducted from April to May 2018.

**Setting:** The primary survey was conducted at community level and covered all the ten provinces of Zambia.

**Participants:** A total of 3, 686 women of reproductive age (15 to 45 years) who gave birth within the five years before the survey.

**Primary outcome:** Proportion of participants with four or more doses of IPTp-SP

**Statistical analysis:** All analyses were conducted using R-studio statistical software version 4.2.1. Descriptive statistics were computed to summarise participant characteristics and IPTp-SP uptake. Univariate logistic regression was carried out to determine association between the explanatory and outcome variables. Explanatory variables with a p-value less than 0.20 on univariate analysis were included in the multivariable logistic regression model and crude and adjusted odds ratios (AORs) along with their 95% confidence intervals (CIs) were computed ( $p < 0.05$ ).

**Results:** Of the total sample of 1,163, only 7.5% of participants received IPTp-SP 4+. Province of residence and wealth tertile were associated with uptake of IPTp-SP doses; participants from Luapula (aOR=8.72, 95%CI [1.72–44.26,  $p=0.009$ ]) and Muchinga (aOR=6.67, 95%CI [1.19–37.47,  $p=0.031$ ]) provinces were more likely to receive IPTp-SP 4+ compared to those from Copperbelt province. Conversely, women in the highest wealth tertile were less likely to receive IPTp-SP 4+ doses compared to those in the lowest quintile (aOR=0.32; 95%CI [0.13–0.79,  $p=0.014$ ])

**Conclusion:** These findings confirm a low uptake of four or more doses of IPTp-SP in the country. Strategies should focus on increased coverage of IPTp-SP in provinces with much higher malaria burden where the risk is greatest and the ability to afford health care lowest.

**Word count: 295**

**Key words:** Malaria in Pregnancy, Intermittent Preventive Treatment, Uptake, Policy, Zambia.

### Strengths and weakness

- Use of large dataset from the 2018 malaria in pregnancy (MIP) survey with a nationally representative sample reduced selection bias and increased external validity and generalisability of the findings .
- Use of multi-stage random sampling technique reduced selection bias and increased validity of the findings
- Inclusion into analysis only women of reproductive age who gave birth after the new IPTp-SP policy was introduced reduced information bias and increased internal validity of the study
- Use of secondary data limited the choice of variables to be included in the analysis
- Exclusion of participants with incomplete data could have reduced the power of the study



## Introduction

Globally, there are an estimated 247 million cases of malaria reported from 84 malaria-endemic countries, with the majority (95%) being reported from the world health organisation (WHO) African Region. Sub-Saharan Africa is disproportionately affected, accounting for an estimated 350 to 500 million cases, 1 to 3 million deaths, 10,000 maternal and 200,000 neonatal deaths per year [1,2]. With an estimated 125 million pregnant women being at risk of contracting malaria globally, malaria in pregnancy (MIP) remains an important preventable cause of adverse maternal, neonatal health outcomes worldwide [3-5]. Out of an estimated 50 million annual pregnancies in malaria-endemic countries around the world each year, more than 50% of these live in the tropical areas of Africa where there is a high transmission of *P. falciparum* [6,7].

Malaria is a parasitic disease caused by a protozoon of the genus *Plasmodium*. Although there are species of malaria that infect humans— *Plasmodium falciparum*, *P. malariae*, *P. ovale*, *P. vivax* and *P. knowlesi*— two main species, *P. falciparum* and *P. vivax*, pose the greatest risk and contribute to adverse outcomes. *P. falciparum* is the deadliest malaria parasite and the most prevalent on the African continent [7,8]. Malaria parasites contribute to adverse pregnancy and birth outcomes due to their preferential accumulation in placental intervillous spaces, putting pregnant women and their babies at an increased risk. MIP is associated with anaemia, miscarriage, premature birth, stillbirth, congenital infection, low birth weight (lbw), maternal, foetal and perinatal death; one in four women have evidence of placental infection at the time of delivery [7-9]. Moreover, evidence from previous studies shows that lbw is associated with a marked increase in infant mortality, high rates of cognitive impairment, learning disability, and behavioural problems [9-12].

Zambia is a sub-Saharan African country with a high malaria burden with an approximate 5.2 million annual malaria cases and an estimated 200,000 pregnancies being at risk of malaria [13]. The Zambia National Malaria Elimination Centre (NMEC) in line with WHO strategic framework of malaria prevention and control during pregnancy has developed and is implementing an MIP policy which includes the provision of four or more doses of intermittent preventive treatment of malaria during pregnancy with sulfadoxine pyrimethamine (IPTp-SP) [14]. Other interventions are insecticide treated nets (ITNs), in-door residual spraying (IRS) and case management.

IPTp-SP and ITN interventions are being implemented as part of antenatal care (ANC) services [15] and involve administration of sulfadoxine pyrimethamine (SP) (comprising three tablets containing 500 mg/25 mg SP, giving the total required dosage of 1500 mg/75 mg SP) as direct observed therapy (DOT) to pregnant women. The first IPTp-SP dose is administered during the second trimester, 13-16 gestation

1  
2  
3 weeks, followed by monthly doses until delivery for at least four doses. ANC has been identified to provide  
4 a good platform for regular and close contact between pregnant women and skilled health personnel for  
5 improved service delivery and monitoring. Zambia follows the 2016 WHO ANC model which recommends  
6 a minimum of 8 ANC contacts with the first contact scheduled to take place in the first trimester, two  
7 contacts in the second trimester and five contacts scheduled in the third trimester [15, 16].  
8  
9

10  
11  
12 Administration of IPTp-SP is based on the assumption that every pregnant woman living in a high malaria  
13 transmission area has malaria parasites. The parasites live in blood or placenta, whether or not she has  
14 symptoms and signs of malaria [17,18]. Previous studies in Zambia and elsewhere have provided  
15 evidence on the effectiveness of IPTp-SP on improved maternal and new-born health outcomes. In  
16 Zambia, administration of two or more doses of IPTp-SP showed a decrease in low birthweight among  
17 paucigravid and multigravid women compared to one dose [19]. A study conducted in Mali [20] showed  
18 that addition of a third dose of IPTp-SP led to a reduced risk of placental malaria, low birth weight and  
19 preterm births in all gravidae, compared with the standard two dose regimen. A systematic review and  
20 meta-analysis on Intermittent preventive therapy for malaria during pregnancy using 2 vs 3 or more doses  
21 of sulfadoxine-pyrimethamine and risk of low birth weight in Africa by Kayentao and colleagues [21]  
22 showed that three or more doses were associated with a 3.3% reduction in low birth weight, 3.1%  
23 reduction in placental malaria and 1.4% reduction in moderate to severe maternal anaemia.  
24  
25

26  
27  
28 However, the 2018 MIS report [22] shows that the proportion of pregnant women receiving four or more  
29 doses of doses of IPTp-SP is low at 5%. The reasons for the low coverage of IPTp-SP are not clear.  
30 Limited studies have been conducted on the predictors of the uptake of four or more doses of SP in  
31 Zambia. The reasons for the low coverage of IPTp-SP are not clear. Limited studies have been  
32 conducted on the predictors of the uptake of four or more doses of SP in Zambia.  
33  
34

### 35 36 37 **Objectives**

38  
39 The aim of this study was to determine the prevalence and predictors of the uptake of four or more doses  
40 of IPTp-SP in Zambia. Information is required to inform policy and programming to improve uptake of SP  
41 in the country.  
42

### 43 44 45 **Methods**

#### 46 47 48 **Study design**

49  
50 The present study is a secondary analysis of the 2018 Malaria indicator survey done in Zambia. It was a  
51 cross section survey conducted from April to May, 2018. The survey is periodically done to assess the  
52 malaria burden and coverages of key malaria interventions such as vector control, parasite clearance,  
53  
54  
55  
56  
57  
58  
59  
60

1  
2  
3 health promotion, enhanced surveillance, monitoring, evaluation and research, health system capacity,  
4 financing and case management in the general population including MIP. The MIS 2018 was the latest  
5 comprehensive dataset that was representative of the whole country and readily accessible at the time  
6 of writing the manuscript.  
7  
8  
9

### 10 **Study site**

11  
12  
13 The study used the 2018 MIS survey data which covered all the ten provinces of Zambia, making it  
14 nationally representative. The country is divided into ten provinces that are further divided into districts.  
15 For statistical purposes, each district is subdivided into census supervisory areas (CSAs) which are in  
16 turn subdivided into enumeration areas (EAs). The listing of EAs has information on the number of  
17 households and the populations. Zambia is a sub-Saharan African country located in south-central Africa  
18 with a surface area of 752,614 square kilometres. Lusaka, the capital city, is located in the south-central  
19 part of the country [23]. The topography is characterised by a high plateau, river valleys, and water  
20 bodies. The country derives its name from the Zambezi River, which drains all but a small northern part  
21 of the country. It has a tropical climate with the rainy season occurring during October to April. The climate  
22 is suitable for mosquito breeding and malaria transmission takes place throughout the year but peaks  
23 during the rainy season [24,25]. Zambia's population as of 8th September 2022 was 19,610,769. The  
24 male population was 9,603,056 and the female population was 10,007,713 [26].  
25  
26  
27  
28  
29  
30  
31  
32  
33

### 34 **Study participants and procedures**

35  
36  
37 Study participants were women of reproductive age who participated in the 2018 MIS. The country  
38 conducts MIS surveys every two to three years to provide updates on malaria interventions and disease  
39 burden in the country. A total of 3, 686 women of reproductive age who gave birth in the past five years  
40 participated in the 2018 MIS. From this sample, a total of 1, 381 were included in our analysis.  
41  
42  
43  
44  
45

### 46 **Inclusion criteria.**

47  
48 To be included in the study, participants needed to be:

- 49  
50 • Pregnant women who were pregnant in the past two years and five months after the new 2016  
51 policy on the fourth dose IPTp-SP was implemented
- 52  
53 • All women aged between 15 to 49 years from all the ten provinces

54  
55 Women who did not give consent and those who did not complete the individual questionnaires were not  
56 included in the analysis.  
57

### 58 **Sample size estimation**

The study participants in the main survey were selected using a two-stage cluster sampling technique which are based on a nationally representative sample of 4,177 households from 179 standard enumeration areas (SEAs) randomly selected from all ten provinces. Based on these criteria, at least 2,176 households were required in the rural domain. For further details on the 2018 MIS sampling technique and sample size determination see the 2018 MIS published report by the Zambian ministry of health.

#### **Assumptions for the sample size determination were;**

- 95% confidence interval
- 80% power
- design effect of 2.50
- Z-score of 1.96
- 10% relative standard error
- Margin of error of 2%
- 20% adjustment for non-response

**The estimated minimum sample size in this study was determined by the formula below;**

$$n = \frac{z^2 \times p(1-p)(DEFF)}{d^2} = 1141 \quad (25)$$

Where: n is the calculated sample size, z =1.96 is the statistic that defines the level of confidence required, p=0.05 is a prevalence of uptake of IPTp-SP among pregnant women in Zambia, expressed as a proportion of that population

D=0.02 is the desired level of precision, DEFF=2.5 is the design effect [27].

#### **Variables**

The variables for the study were as follows:

- Outcome variable: uptake of four or more doses of IPTp-SP
- Predictor variables: sociodemographic variables (age, parity, place and province of residence, religion, educational level, wealth index)
- Basic knowledge about malaria
- Knowledge about malaria treatment

1  
2  
3 The predictor variables were selected based on thorough literature review. In this study uptake means  
4 receiving any dosage of SP during pregnancy, with each dose being given at least 1 month apart starting  
5 from the second trimester of gestation, until the time of delivery as directly observed therapy.  
6  
7

### 8 9 **Data sources and processing**

10  
11 The merged 2018 MIS dataset comprising women of reproductive age (15 to 49 years) was extracted  
12 into the Microsoft office excel sheet 2013 using the data extraction tool. We subset women 15 to 49 years  
13 of age who were eligible to complete the questionnaire. From the eligible women, we subsetted women  
14 who consented. Further, a subset of women who completed the questionnaire and delivered in 2016 or  
15 later (after the new IPTp policy) was done using the lubridate library in R Studio. This was determined by  
16 using the age of the youngest child (that is, if a child was less than 881 days).  
17  
18  
19  
20  
21  
22

### 23 **Statistical analysis**

24  
25 R-studio statistical software version 4.2.1. was used for all the analyses. Descriptive statistical analysis  
26 was carried out first on socio-demographics to obtain frequencies and proportions. The proportion of  
27 missing values on the outcome was calculated. The correlation among the predictor variables was  
28 explored. Thereafter, univariate logistic regression was carried out and explanatory variables whose p-  
29 values were less than 0.2 were presented in table 2. The estimators with a p-value level of 0.20 chose  
30 the adjusted estimate more frequently when confounding is present and so produced less bias than the  
31 estimators with a p-value level of 0.05 [28]. Then, a backward selection approach using stepwise method  
32 with a p-value of 0.2 threshold was used to select explanatory variables to be included in the multivariable  
33 logistic regression for further analysis of the association to obtain adjusted odds ratios. We also compared  
34 Akaike's Information Criteria (AIC), Bayesian Information Criteria (BIC) and Pseudo-R2 between the  
35 multivariable model which included all variables (full model) and the model after backward selection  
36 approach (reduced model) for model fit. To account for the differences in sampling probabilities across  
37 the clusters and strata, sample weighting was used to adjust for the cluster sampling design using "svy"  
38 function in R studio and "svyset" command to match the multistage cluster sampling design method.  
39 Results from univariable and multivariable analysis were presented as crude and adjusted odds ratios  
40 along with their 95% CIs, respectively (p-value <0.05).  
41  
42  
43  
44  
45  
46  
47  
48  
49  
50  
51  
52  
53  
54

55 The missing values were imputed using the multiple imputation by chain equation (MICE) methods. The  
56 study explored the proportions of missing values and compared the estimates from the full data models  
57  
58  
59  
60

1  
2  
3 and the imputed models to see whether there was an observed difference. The multiple imputation was  
4 carried on multivariable analysis only [28]  
5  
6  
7

## 8 **Patient and Public Involvement**

9  
10 The study design was determined by the research team. Participants and the public were not directly  
11 involved in the conceptualisation and design of the study. Selection of study participants for the 2018 MIS  
12 was done in collaboration with the provincial and district health managers. The public were involved in  
13 the participant recruitment for the primary survey. However, since the study used secondary data from  
14 the 2018 MIS, patients and the public were not directly involved in the selection of the variables to be  
15 included in the analysis. Rather, the team from Levy Mwanawasa Medical university and National Malaria  
16 Elimination Centre decided and agreed on the variables to be included in the analysis. Consequently,  
17 permission for access to the dataset used for the analysis was granted by the National Malaria Elimination  
18 centre in consultation with the Ministry of Health. After analysis and report writing, the research team held  
19 a dissemination meeting and study findings were shared with key stakeholders, including the Levy  
20 Mwanawasa Medical University School of Public Health, Ministry of Health and Zambia National Public  
21 Health Institute. A final report was also written and shared with the funding organization.  
22  
23  
24  
25  
26  
27  
28  
29  
30  
31  
32

## 33 **Results**

### 34 **Participants**

35  
36 A summary of the recruitment algorithm of study participants is shown below. A total of 4044 women of  
37 reproductive age were eligible to complete the questionnaire. Out of these, 3, 686 (91%) completed the  
38 questionnaire; 358 (9%) did not provide consent and were excluded from the study. A total of 1,381  
39 (34%) participants comprising women who delivered after the new IPTp-SP policy was introduced were  
40 included into the final sample for analysis (**Supplementary figure 1**).  
41  
42  
43  
44  
45  
46

### 47 **Demographic characteristics of respondents**

48  
49 Majority (68.9%) of study participants were in the age group 15-29 years; almost one third (30.8%) were  
50 in the age group 30-44 years and 0.3% were aged above 45 years. Close to half (48.9%) had completed  
51 primary education, 28.2% had secondary school education and 2.8% had gone up to higher education.  
52 Most respondents (81.3%) lived in rural areas. With regard to province of residence, 19.1% were from  
53 Luapula, 18.0% from Eastern, 17.2% from Western and 4.1% from Copperbelt provinces. One fifth  
54 (21.9%) of the study participants were in lowest wealth tertile; 15.6% were in the middle tertile.  
55 Concerning religion, more than half (56.8%) of study participants were protestants followed by Catholics  
56  
57  
58  
59  
60

(22.2%); Muslims constituted 0.1% of the respondents. Majority (97.3%) attended ANC and most (92.5%) took less than four doses of IPTp-SP. Majority (71.3%) took three doses of IPTp-SP, 14.5% took two doses, 7.5% took IPTp-SP 4+ doses, 6.9% took only one dose. The proportions of IPTp-SP uptake increased from IPTp-SP 1 to IPTp-SP 3 and drastically dropped at IPTp-SP 4+. More than half (52.5%) of the study participants had three or more children and 22.2% had two children. Concerning knowledge on malaria prevention measures, most (76.4%) were knowledgeable and only 45.0% were exposed to media messages (Table 1).

**Table 1: Socio-demographic and clinical characteristics of the study participants (N=1381)**

| Variable               | N (%)       |
|------------------------|-------------|
| <b>Age(years)</b>      |             |
| 15-24                  | 678 (49.1)  |
| 25-34                  | 497 (36.0)  |
| 35+                    | 205 (14.8)  |
| Missing                | 1 (0.1)     |
| <b>Residence</b>       |             |
| Rural                  | 1123 (81.3) |
| Urban                  | 258 (18.7)  |
| <b>Province</b>        |             |
| Central                | 93 (6.7)    |
| Copperbelt             | 56 (4.1)    |
| Eastern                | 249 (18.0)  |
| Luapula                | 264 (19.1)  |
| Lusaka                 | 87 (6.3)    |
| Muchinga               | 95 (6.9)    |
| North-Western          | 90 (6.5)    |
| Northern               | 120 (8.7)   |
| Southern               | 90 (6.5)    |
| Western                | 237 (17.2)  |
| <b>Wealth tertile</b>  |             |
| Low                    | 578 (41.8)  |
| Middle                 | 302 (21.9)  |
| High                   | 501 (36.3)  |
| <b>Education level</b> |             |
| Primary                | 675 (48.9)  |
| Secondary+             | 428 (31.0)  |
| Missing                | 278 (20.1)  |
| <b>Religion</b>        |             |
| Christian              | 1092 (79.1) |
| Non-Christian          | 289 (20.9)  |

|                                           |             |
|-------------------------------------------|-------------|
|                                           |             |
| <b>Parity</b>                             |             |
| 1                                         | 348 (25.2)  |
| 2                                         | 307 (22.2)  |
| 3+                                        | 725 (52.5)  |
| Missing                                   | 1 (0.1)     |
|                                           |             |
| <b>Got ANC</b>                            |             |
| Yes                                       | 1344 (97.3) |
| No                                        | 35 (2.5)    |
| Missing                                   | 2 (0.2)     |
|                                           |             |
| <b>IPTp-SP Uptake<sup>a</sup></b>         |             |
| 1                                         | 80 (6.9)    |
| 2                                         | 167 (14.3)  |
| 3                                         | 829 (71.3)  |
| 4+                                        | 87 (7.5)    |
|                                           |             |
| <b>Exposure to media message</b>          |             |
| No                                        | 759 (55.0)  |
| Yes                                       | 622 (45.0)  |
| Missing                                   |             |
|                                           |             |
| <b>Knowledge about Malaria prevention</b> |             |
| Not knowledgeable                         | 241 (17.5)  |
| Knowledgeable                             | 1055 (78.4) |
| Missing                                   | 85 (6.1)    |
|                                           |             |
| <b>Basic Malaria knowledge</b>            |             |
| Incorrect                                 | 351 (25.4)  |
| Correct                                   | 945 (68.4)  |
| Missing                                   | 85 (6.2)    |

<sup>a</sup> The proportions excludes the missing values

### Predictors for the uptake of adequate doses of IPTp-SP (4+ doses)

The overall uptake of adequate (4+) doses of IPTp-SP was 7.5%. The uptake of 4+ doses of IPTp-SP decreased by level of education ranging from 9.2% for women with primary education to 4.6% for women with higher education. The same trend was observed across age group, i.e. decrease from 8.5% in 15-24 years age group to 5.5% in age group of 35 and above years. The women from rural area had higher (7.6%) uptake of adequate doses compared to women from urban area (7.2 %). The uptake of adequate doses of SP was highest for women in the low wealth tertile (11.4 %). Also, women who were not exposed to media messages had higher uptake of SP (8.9%) compared to those who were exposed to media messages (5.9%) (Table 2).



1  
2  
3 The results of univariate logistic regression analysis (crude odds ratios) show that woman's education  
4 level, place of residence, province, wealth tertile, exposure to media messages and knowledge about  
5 malaria prevention were significantly associated with the adequate uptake of IPTp-SP. While age group  
6 showed no evidence of association with adequate uptake of IPTp-SP. The results in table 2 shows  
7 significant lower odds of taking an adequate IPTp-SP among women with at least secondary level of  
8 education (0.30, 95%CI 0.15-0.61, p-value=0.001) compared to those with primary level of education.  
9 Luapula and Muchinga provinces show significant higher odds of taking an adequate IPTp-SP (13.57,  
10 95%CI 2.98-61.77, p-value=0.001 and 11.50, 95%CI 2.32-56.95, p-value=0.003, respectively) compared  
11 to those from Copperbelt. However, this may be due to chance given the low sample size in Copperbelt  
12 province which is a reference. This is evidenced by the wide 95% confidence interval, which increases  
13 uncertainty.

14  
15 Women in the middle and high wealth tertile show significant lower odds of taking adequate IPTp-SP  
16 (0.35, 95%CI 0.17-0.72, p-value=0.005 and 0.10, 95%CI 0.10-0.20, p-value<0.001, respectively)  
17 compared to those in low wealth tertile. Women who were exposed to media messages had significant  
18 lower odds of taking an adequate IPTp-SP (0.49, 95%CI 0.28-0.85, p-value=0.011) compared to those  
19 who were not exposed. Women who had knowledge about malaria prevention had significant lower odds  
20 of taking an adequate IPTp-SP (0.44, 95%CI 0.23-0.86, p-value=0.016) compared to those who had  
21 none.

22  
23 Using backward selection method with p-value threshold of 0.2, the reduced (final) model retained age  
24 group, education level, province and wealth quintile. Therefore, after adjusting for age group, education  
25 level and wealth quintile, Luapula and Muchinga provinces still showed significant higher (though  
26 reduced) odds of taking an adequate IPTp-SP (8.72, 95%CI 1.72-44.26, p-value=0.009 and 6.67, 95%CI  
27 1.19-37.47, p-value=0.031, respectively) compared to those from Copperbelt. And after adjusting for age  
28 group, education level and province, only women in the higher wealth tertile had significant lower odds  
29 of taking an adequate IPTp-SP (0.32, 95%CI 0.13-0.79, p-value=0.014) compared to those in low wealth  
30 tertile.

31  
32 Comparing AIC, BIC and Pseudo-R<sup>2</sup> we have 417.7, 490.2 and 0.09 for the reduced model, and 436.7,  
33 496.3 and 0.08 for the full model, respectively. This suggests that the reduced model is better fitted  
34 compared to the full model. This is because the AIC and BIC are lower, and Pseudo-R<sup>2</sup> is higher for the  
35 reduced model compared to the full model. The proportion of missing values were highest under  
36 education level variable which accounted to 20.1%. Comparing estimates of full data model from  
37 multivariable analysis and the imputed multivariable analysis, there is no much difference in the estimates  
38  
39  
40  
41  
42  
43  
44  
45  
46  
47  
48  
49  
50  
51  
52  
53  
54  
55  
56  
57  
58  
59  
60

apart from the fact that the 95% CI are narrower in some instances in imputed model compared to full data model. However, estimates from multiple imputation are only valid when data is at least missing at random (Table 2).

**Table 2: Predictors for the adequate uptake of IPTp-SP ( $\geq 4$  doses) during pregnancy in Zambia**

| Variable                 | n(weighted) | n(%)     | cOR <sup>a</sup> | 95% CI <sup>b</sup> | p-value | aOR <sup>c</sup> | 95% CI     | P-value |
|--------------------------|-------------|----------|------------------|---------------------|---------|------------------|------------|---------|
| Overall                  | 1163        | 87 (7.5) |                  |                     |         |                  |            |         |
| <b>Age group (Years)</b> |             |          |                  |                     |         |                  |            |         |
| 15-24                    | 542         | 46 (8.5) | 1.00             |                     |         | 1.00             |            |         |
| 25-34                    | 441         | 31 (7.0) | 0.67             | 0.37-1.21           | 0.181   | 0.54             | 0.26-1.08  | 0.083   |
| 35+                      | 180         | 10 (5.5) | 0.58             | 0.24-1.35           | 0.202   | 0.58             | 0.23-1.51  | 0.266   |
| <b>**Education level</b> |             |          |                  |                     |         |                  |            |         |
| Primary                  | 542         | 50 (9.2) | 1.00             |                     |         | 1.00             |            |         |
| Secondary+               | 396         | 18 (4.6) | 0.30             | 0.15-0.61           | 0.001*  | 0.55             | 0.27-1.11  | 0.093   |
| <b>Residence</b>         |             |          |                  |                     |         |                  |            |         |
| Rural                    | 927         | 70 (7.6) | 1.00             |                     |         |                  |            |         |
| Urban                    | 219         | 17 (7.2) | 0.22             | 0.11-0.44           | <0.001* |                  |            |         |
| <b>Province</b>          |             |          |                  |                     |         |                  |            |         |
| Copperbelt               | 44          | 2 (4.6)  | 1.00             |                     |         | 1.00             |            |         |
| Central                  | 89          | 3 (3.4)  | 2.15             | 0.28-16.78          | 0.463   | 2.03             | 0.27-15.48 | 0.493   |
| Eastern                  | 210         | 11 (5.2) | 1.72             | 0.32-9.35           | 0.528   | 1.15             | 0.19-7.00  | 0.878   |
| Luapula                  | 196         | 36(18.4) | 13.5             | 2.98-61.77          | 0.001*  | 8.72             | 1.72-44.26 | 0.009*  |
| Lusaka                   | 70          | 0 (0.0)  | -                | -                   | -       | -                | -          | -       |
| Muchinga                 | 83          | 13(15.7) | 11.5             | 2.32-56.95          | 0.003*  | 6.67             | 1.19-37.47 | 0.031*  |

|                                             |     |          |      |            |         |      |            |        |
|---------------------------------------------|-----|----------|------|------------|---------|------|------------|--------|
| North-western                               | 84  | 4 (4.8)  | 2.32 | 0.38-14.08 | 0.359   | 2.08 | 0.32-13.34 | 0.441  |
| Northern                                    | 111 | 16(14.4) | 8.94 | 1.86-42.87 | 0.006   | 4.13 | 0.73-23.42 | 0.109  |
| Southern                                    | 80  | 1 (1.3)  | 0.82 | 0.07-9.59  | 0.873   | 1.40 | 0.11-17.90 | 0.794  |
| Western                                     | 196 | 1 (0.5)  | 0.53 | 0.05-6.13  | 0.608   | -    | -          | -      |
| <b>Wealth tertile</b>                       |     |          |      |            |         |      |            |        |
| Low                                         | 438 | 50(11.4) | 1.00 |            |         | 1.00 |            |        |
| Middle                                      | 259 | 16 (6.2) | 0.35 | 0.17-0.72  | 0.005*  | 0.52 | 0.19-1.45  | 0.212  |
| High                                        | 466 | 21 (4.5) | 0.10 | 0.10-0.20  | <0.001* | 0.32 | 0.13-0.79  | 0.014* |
| <b>Exposure to media messages</b>           |     |          |      |            |         |      |            |        |
| No                                          | 607 | 54 (8.9) | 1.00 |            |         |      |            |        |
| Yes                                         | 556 | 33 (5.9) | 0.49 | 0.28-0.85  | 0.011*  |      |            |        |
| <b>**Knowledge about malaria prevention</b> |     |          |      |            |         |      |            |        |
| Not knowledgeable                           | 180 | 22(12.2) | 1.00 |            |         |      |            |        |
| Knowledgeable                               | 920 | 60 (6.5) | 0.44 | 0.23-0.86  | 0.016*  |      |            |        |

<sup>a</sup>cOR stands for Crude Odds ratio <sup>b</sup>CI stands for Confidence interval <sup>c</sup>aOR stands for adjusted odds ratio  
 \*significant at 5% level \*\*The observations do not add up to the overall sample because the variables have missing values. Note: AIC, BIC and Pseudo-R2 are 417.7, 490.2 and 0.09 for the reduced model, and 436.7, 496.3 and 0.08 for the model which included all the variables (full model) in the table, respectively

## Discussion

The study aimed to determine the predictors of IPTp-SP uptake for four or more doses in Zambia. Our findings show that uptake of four or more doses of IPTp-SP was low at 7.5%. The place and province of residence were significantly associated with adequate uptake of IPTp-SP doses. Women who were residents of Luapula and Muchinga provinces had higher odds of taking adequate doses with reference

1  
2  
3 to those in the Copperbelt province. Conversely, women in the highest wealth tertile were significantly  
4 less likely to receive IPTp-SP 4+ doses compared to those in the lowest tertile.  
5  
6

7 Our findings show an association between IPTp-SP uptake and place of residence. Women from rural  
8 provinces such as Muchinga and Luapula showed higher odds of IPTp-SP uptake than those from urban  
9 provinces of Copperbelt and Lusaka. The observed variation in the odds of IPTp-SP uptake between the  
10 urban and rural provinces could be due to differences in the malaria prevalence among these provinces.  
11 For example, Luapula province has a high malaria prevalence of 63% compared to 3% in Lusaka and  
12 Southern provinces. The province is rural with many water bodies, enhancing malaria transmission.  
13 These factors also make malaria transmission likely to be longer and more intense compared to other  
14 provinces. Thus, the province continues to report the largest malaria burden in the country. Women in  
15 provinces with low prevalence of malaria may not take adequate IPTp-SP due to low perceived risk  
16 [29,30]. On the contrary, women from regions of high level of malaria transmission, may take adequate  
17 doses of IPTp-SP due to higher risk perception. In these regions, emphasis on SP uptake during  
18 awareness messages could be higher due to the higher risk of contracting malaria. This finding suggests  
19 that women in rural areas may consider themselves at higher risk of contracting malaria compared to  
20 those in urban areas. Exploratory studies are required to investigate the reasons for variations in uptake  
21 of IPTp-SP among different provinces. These findings corroborate those from studies conducted in  
22 Uganda [30] and Tanzania [31,32] which showed that variations in IPTp-SP uptake were related to  
23 differences in malaria transmission in the regions. The study in Tanzania showed that residents of the  
24 Central, Eastern, Southern, Lake regions, Southern highlands and Southwest highlands were  
25 significantly associated with the optimal uptake of SP doses compared to the residents of Zanzibar and  
26 Northern zones where malaria transmission was low. Similarly, the Uganda study showed that pregnant  
27 women residing in Eastern and Coastal regions had higher odds of optimal uptake of SP.  
28  
29  
30  
31  
32  
33  
34  
35  
36  
37  
38  
39  
40  
41  
42  
43

44 Our findings show that participants who had knowledge about malaria prevention and exposure to media  
45 messages had less odds of receiving adequate IPTp-SP doses. These findings contradict the study  
46 conducted by Muntayi et al [33] which showed that maternal knowledge on IPTp-SP positively influenced  
47 the uptake of the intervention in Tanzania, Cameroon, Zambia and Ghana. The difference between these  
48 findings and the current study could be that our study did not assess specifically the knowledge about  
49 IPTp-SP and its benefits. Rather, the study focused on knowledge about malaria prevention in general.  
50 This calls for more awareness on malaria interventions in general and about the recommended doses of  
51 IPTp-SP during pregnancy.  
52  
53  
54  
55  
56  
57  
58  
59  
60

1  
2  
3 Moreover, our findings showed no significant association between education level and uptake of IPTp-  
4 SP. However, unadjusted analysis showed that women who had secondary level education and above  
5 had less odds of taking four or more doses of IPTp-SP compared with those who attained primary  
6 education. Our findings contrast previous studies and surveys. Literally, one would expect that having  
7 secondary educational level or higher may be of influence on the uptake of the recommended doses of  
8 IPTp-SP compared to women with a lower education level. A study which compared MIS results of 12  
9 countries in sub-Saharan Africa [34] found that women with higher education had higher odds of reporting  
10 receiving three or more doses of IPTp-SP. The differences in the findings could be as a result of using  
11 different methods. It could also be due to selection bias; a large proportion of our study participants were  
12 those with primary level education who mainly resided in rural areas.

13  
14  
15  
16  
17  
18  
19  
20  
21 This study found that women in the highest and middle wealth tertile had less odds of taking four or more  
22 doses of IPTp-SP compared to those in the lowest wealth tertile. This finding contradicts previous studies  
23 [35,36] which revealed that wealth index has a significant effect on uptake of IPTp-SP. These studies  
24 showed that the chances of completing the recommended dose of IPTp-SP increased with increase in  
25 wealth index [36]. For example, a study conducted in Senegal found that women in richer or middle  
26 wealth tertile were more likely to use the recommended doses of IPTp-SP [36]. The reason for the  
27 difference between our findings and these studies could be due to confounding by place of residence.  
28 Our findings show that most study participants who took four or more doses of IPTp-SP were from the  
29 rural areas who are mostly in the low wealth tertile. The other reason could be the fact that IPTp-SP is  
30 provided for free in Zambia.

31  
32  
33  
34  
35  
36  
37  
38  
39 There was no significant association noted between age and taking four or more doses of IPTp-SP.  
40 However, the adjusted analysis showed that, compared to the youthful mothers (15 to 24 years), those  
41 aged between 25 and 34 years were less likely to take four or more doses of IPTp-SP. This finding  
42 contradicts previous studies [36,37] which revealed that younger women are less likely to use health  
43 services due to inadequate access to information and communication channels used for IPTp-SP  
44 promotion which are necessary for the uptake of IPTp-SP. For example, a study conducted in Ghana [37]  
45 reported low uptake of the recommended dose of IPTp-SP among the youth. Many youth often hide  
46 their pregnancies and start their ANC late, when they cannot take the recommended doses before  
47 delivery.

48  
49  
50  
51  
52  
53  
54  
55 This study further reports that the uptake of four or more doses of IPTp-SP during pregnancy is still low  
56 at 7.5%. Most women (71.3%) took up to the third dose of IPTp-SP during pregnancy. This finding could  
57 be due to lack of awareness about the new guidelines on the fourth dose. More emphasis is needed on  
58  
59  
60

1  
2  
3 the new guidelines and taking at least three or more doses of IPTp-SP. Health messages should focus  
4 on and emphasise the new policy on four or more doses in the country. This finding is similar to other  
5 studies in sub-Saharan Africa which reported low uptake of the recommended doses of IPTp-SP [38] and  
6 suggests an urgent need for strategies to increase IPTp-SP coverage for improved maternal and newborn  
7 health outcomes in the region. This may contribute to the achievement of the ambitious sustainable  
8 development goals (SDG) and the target of reducing maternal mortality rate (MMR) from 319 to 70 per  
9 100,000 live births [38-44].  
10  
11  
12  
13  
14  
15  
16  
17

### 18 **Study limitations**

19  
20 This study has potential limitations. First, we did not collect the data, but used secondary data from the  
21 2018 MIS. This prevented the team from having control over the measurement and selection of the  
22 variables. Some important variables that would have been of interest such as distance from the health  
23 facility to the communities where people live, stocks of SP, timing of ANC and number of times the woman  
24 attended ANC were not contained in the data set and thus could not be analysed. Further, the MIS data  
25 were cross-sectional, the associations in this study cannot guarantee causation or directionality.  
26  
27  
28  
29  
30

31 Despite these limitations, we believe our findings have provided important information on the low  
32 coverage of four or more doses of IPTp-SP and the associated factors. In addition, use of a nationally  
33 representative data from the 2018 MIS that covered all the provinces increases the generalisability of our  
34 findings.  
35  
36  
37  
38

### 39 **Conclusion**

40  
41 These findings confirm low uptake of four or more doses of IPTp-SP in Zambia at 7.5% and that province  
42 and place of residence and wealth tertile affect IPTp-SP uptake. Strategies and interventions should  
43 focus on increased coverage of IPTp-SP from the current very low levels, with emphasis on provinces  
44 with much higher malaria burden where the risk is greatest and the ability to afford health care lowest.  
45 Interventions should include dissemination messages on the new policy of four or more doses of IPTp-  
46 SP and the benefits of strengthening the linkage between IPTp-SP program with ANC services.  
47  
48  
49  
50  
51  
52  
53

### 54 **Figure Legend/Caption**

55  
56 Supplementary figure 1 : Participant recruitment algorithm  
57  
58

### 59 **Authors' Contribution**

1  
2  
3 DS, CS, and NM contributed to the conception of the study and literature search. DS conducted the  
4 extraction, analysis and drafted the manuscript. CS, NM, BH LSM and HM contributed to the coordination  
5 study activities. CS, NM, BH contributed to the revision of the manuscript. All authors read and approved  
6 the manuscript.  
7  
8  
9

## 10 **Funding Statement**

11  
12  
13 Presidential Malaria Initiative and Centres for Disease Prevention and Control  
14

## 15 **Competing Interests**

16  
17  
18 All authors declare that they have no conflicting interests in this work  
19

## 20 ***Ethics approval***

21  
22  
23 Ethical approval and waiver of consent was given by ERES converge IRB (Ref No. 2021-Nov-004).  
24 Permission to conduct the study and access to the 2018 MIS dataset was granted by the National Health  
25 Research Authority (NRFA) Ref No. NHRA000023/04/03/2022) and Ministry of Health, respectively. The  
26 dataset was then secured as soft copy in the computer. No information regarding names of study  
27 participants was obtained and used; the dataset was only used for the purpose of this study and it was  
28 not given to any other person or organization. No harm was inflicted to the participants, the study used  
29 secondary data and there was no direct contact with study participants.  
30  
31  
32  
33  
34

## 35 **Data Sharing**

36  
37 Data are available upon reasonable request from the corresponding author and with permission of the  
38 ERES ethics review board.  
39  
40  
41

## 42 **Costs and payments**

43  
44 N/A  
45

## 46 **Acknowledgements**

47  
48 We thank Lusaka District Health Management Team who provided field research assistants and study  
49 participants.  
50  
51

## 52 **Acknowledgements**

53  
54 We thank the Field Epidemiology Training Program staff from Levy Mwanawasa Medical University,  
55 School of Public Health for their support; Prof Victor Mukonk, Dean School of Public Health for facilitating  
56 the MSc. Field Epidemiology program at the university; Ms Heilmann Elizabeth Susan for her support in  
57 R studio; US CDC staff and Dr Paul Pyschus for their invaluable support during the development of this  
58  
59  
60

1  
2  
3 research idea. Special thanks go to the National Malaria Elimination Centre management for granting  
4 access to the Malaria Indicator Survey (MIS) dataset.  
5  
6

## 7 8 9 10 11 12 13 14 15 16 17 18 19 20 21 22 23 24 25 26 27 28 29 30 31 32 33 34 35 36 37 38 39 40 41 42 43 44 45 46 47 48 49 50 51 52 53 54 55 56 57 58 59 60

### References

1. WHO, 2023. Malaria. Available at: [Malaria \(who.int\)](#), accessed on 10<sup>th</sup> April, 2023
2. WHO, 2021. World malaria report 2020: 20 years of global progress and challenges. Available at: [World malaria report 2020: 20 years of global progress and challenges \(who.int\)](#), accessed on 10<sup>th</sup> April, 2023
3. WHO, 2023. Malaria. Available at: [Malaria \(who.int\)](#), accessed on 10<sup>th</sup> April, 2023
4. WHO, 2023. World malaria report 2020: Tracking progress and gaps in the global response to malaria. Available at: [World malaria report 2022 \(who.int\)](#), accessed on 10<sup>th</sup> April, 2023
5. Bauserman M, Conroy AL, North K, Patterson J, Bose C, Meshnick S. An overview of malaria in pregnancy. *Semin Perinatol*, 2019;43(5):282-290. doi: 10.1053/j.semperi.2019.03.018.
6. Dellicour S, Tatem AJ, Guerra CA, Snow RW, Kuile FO. Quantifying the number of pregnancies at risk of malaria in 2007: A demographic study. *PLoS Med* [Internet]. 2010;7. Available from: <https://doi.org/10.1371/journal.pmed.1000221>
7. Gnémé A, Guelbéogo WM, Riehle MM, Tiono AB, Diarra A, Kabré GB, et al. Plasmodium species occurrence, temporal distribution and interaction in a child-aged population in rural Burkina Faso. *Malar J*. 2013 Feb 19;12:67.
8. Desai M, ter Kuile FO, Nosten F, McGready R, Asamoah K, Brabin B, et al. Epidemiology and burden of malaria in pregnancy. *Lancet Infect Dis*. 2007 Feb;7(2):93–104.
9. Greenwood AM, Armstrong JR, Byass P, Snow RW, Greenwood BM. Malaria chemoprophylaxis, birth weight and child survival. *Trans R Soc Trop Med Hyg*. 1992;86(5):483–5.
10. Steketee RW, Nahlen BL, Parise ME, Menendez C. The burden of malaria in pregnancy in malaria-endemic areas. *Am J Trop Med Hyg*. 2001;64(1-2 Suppl):28–35.



- 1  
2  
3  
4  
5  
6  
7  
8  
9  
10  
11  
12  
13  
14  
15  
16  
17  
18  
19  
20  
21  
22  
23  
24  
25  
26  
27  
28  
29  
30  
31  
32  
33  
34  
35  
36  
37  
38  
39  
40  
41  
42  
43  
44  
45  
46  
47  
48  
49  
50  
51  
52  
53  
54  
55  
56  
57  
58  
59  
60
11. Corbett SS, Drewett RF. To what extent is failure to thrive in infancy associated with poorer cognitive development? A review and meta-analysis. *J Child Psychol Psychiatry*. 2004 Mar;45(3):641-54. doi: 10.1111/j.1469-7610.2004.00253.x. PMID: 15055382
  12. Agarwal P, Lim SB. Long-term follow-up and outcome of extremely-low-birth-weight (ELBW) infants. *Ann Acad Med Singapore*. 2003 May;32(3):346–53.
  13. Mace KE, Chalwe V, Katalenich BL, Nambozi M, Mubikayi L, Mulele CK, et al. Evaluation of sulphadoxine-pyrimethamine for intermittent preventive treatment of malaria in pregnancy: a retrospective birth outcomes study in Mansa, Zambia. *Malar J*. 2015 Feb 7;14(1):69
  14. Chaponda EB, Chandramohan D, Michelo C, Mharakurwa S, Chipeta J, Chico RM. High burden of malaria infection in pregnant women in a rural district of Zambia: a cross-sectional study. *Malar J* [Internet]. 2015 Sep 30 [cited 2021 Jan 9];14. Available from: <https://www.ncbi.nlm.nih.gov/pmc/articles/PMC4590700/>
  15. Zambia National Malaria Elimination Centre, 2017. National Malaria Elimination Strategic Plan 2017-2021. Available at: [Malaria Elimination Strategy — Zambia National Malaria Elimination Centre \(nmec.org.zm\)](http://www.nmec.org.zm), accessed on 12<sup>th</sup> April, 2023
  16. Ministry of Health, 2018. ANC guidelines for a positive pregnancy experience. Available at: [ANC guidelines for a positive pregnancy experience | WHO | Regional Office for Africa](http://www.who.int/region/africa/publications/anc-guidelines-for-a-positive-pregnancy-experience), accessed on 13<sup>th</sup> April, 2023
  17. Sialubanje, C., Kaiser, J.L., Ngoma, T. et al. Postnatal care services in rural Zambia: a qualitative exploration of user, provider, and community perspectives on quality of care. *BMC Pregnancy Childbirth* 23, 39 (2023). <https://doi.org/10.1186/s12884-023-05350-w>
  18. Sikambale C, Halwindi H, Baboo KS. Factors Influencing Utilization of Intermittent Presumptive Treatment of Malaria (IPTp) Services by Pregnant Women in Sesheke District of Western Province Zambia. *Med J Zambia*. 2013;40(1):24–32.
  19. Zakama AK, Ozarslan N, Gaw SL. Placental Malaria. *Curr Trop Med Rep*. 2020;7(4):162-171. doi: 10.1007/s40475-020-00213-2.

- 1  
2  
3  
4  
5  
6  
7  
8  
9  
10  
11  
12  
13  
14  
15  
16  
17  
18  
19  
20  
21  
22  
23  
24  
25  
26  
27  
28  
29  
30  
31  
32  
33  
34  
35  
36  
37  
38  
39  
40  
41  
42  
43  
44  
45  
46  
47  
48  
49  
50  
51  
52  
53  
54  
55  
56  
57  
58  
59  
60
19. Mace KE, Chalwe V, Katalenich BL, Nambozi M, Mubikayi L, Mulele CK, et al. Evaluation of sulphadoxine-pyrimethamine for intermittent preventive treatment of malaria in pregnancy: a retrospective birth outcomes study in Mansa, Zambia. *Malar J.* 2015 ;14(1):69.
  20. Diakite OS, Kayentao K, Traoré BT, Djimde A, Traoré B, Diallo M. Superiority of 3 over 2 doses of intermittent preventive treatment with sulfadoxine-pyrimethamine for the prevention of malaria during pregnancy in Mali: A randomized controlled trial. *Clin Infect Dis.* 2011;53(3):215-23. doi: 10.1093/cid/cir374.
  21. Kayentao K, Garner P, van Eijk AM, Naidoo I, Roper C, Mulokozi A, MacArthur JR, Luntamo M, Ashorn P, Doumbo OK, ter Kuile FO. Intermittent preventive therapy for malaria during pregnancy using 2 vs 3 or more doses of sulfadoxine-pyrimethamine and risk of low birth weight in Africa: systematic review and meta-analysis. *JAMA.* 2013; 309(6):594-604. doi: 10.1001/jama.2012.216231.
  22. Ministry of Health, Central Statistics Office, PATH, PMI USAID, CDC, UNICEF, and WHO, 2018. MIS 2018: Zambia Malaria Indicator Survey 2018. Available at: [https://www.malariasurveys.org/documents/Zambia\\_MIS2018\\_FINAL-withSigs\\_20190415.pdf](https://www.malariasurveys.org/documents/Zambia_MIS2018_FINAL-withSigs_20190415.pdf), accessed on 10<sup>th</sup> April, 2023
  23. Central Statistical Office (Zambia), ICF International, Ministry of Health (Zambia), University Teaching Hospital (Zambia), University of Zambia. Zambia Demographic and Health Survey 2018-2019. Fairfax, United States of America: ICF International, 2020. Available at: [Zambia Demographic and Health Survey 2018-2019 | GHDX \(healthdata.org\)](https://ghdx.healthdata.org/studies/zambia-demographic-and-health-survey-2018-2019)
  24. US President's Malaria Initiative (PMI), 2022. Zambia. Available at: [Zambia - PMI](https://www.pmi.gov/zambia), accessed on 14<sup>th</sup> April, 2023
  25. Riedel N, Vounatsou P, Miller JM, Gosoni L, Chizema-Kawesha E, Mukonka V, et al. Geographical patterns and predictors of malaria risk in Zambia: Bayesian geostatistical modelling of the 2006 Zambia national malaria indicator survey (ZMIS). *Malar J.* 2010;9(1).
  26. Zambia Statistics Agency, 2022. 2022 Census. Available at: <https://www.zamstats.gov.zm/2022-census/>, accessed on 14<sup>th</sup> April, 2023
  27. Pourhoseingholi MA, Vahedi M, Rahimzadeh M. Sample size calculation in medical studies. *Gastroenterol Hepatol Bed Bench,* 2013; 6(1):14–7.

- 1  
2  
3 28. Rubin DB. Inference and Missing Data. *Biometrika*. 1976;63(3):581–592.  
4 <https://doi.org/10.1093/biomet/63.3.581>  
5  
6  
7  
8 29. Okoli CI, Hajizadeh M, Rahman MM, Khanam R. Decomposition of socioeconomic inequalities  
9 in the uptake of intermittent preventive treatment of malaria in pregnancy in Nigeria: evidence  
10 from Demographic Health Survey. *Malar J*. 2021;20:300  
11  
12  
13 30. Okethwangu D, Opigo J, Atugonza S, Kizza CT, Nabatanzi M, Biribawa C, et al. Factors  
14 associated with uptake of optimal doses of intermittent preventive treatment for malaria among  
15 pregnant women in Uganda: analysis of data from the Uganda Demographic and Health Survey,  
16 2016. *Malar J*. 2019; 18(1):250.  
17  
18  
19  
20  
21 31. Mchwampaka WM, Tarimo D, Chacky F, Mohamed A, Kishimba R and Smwel A. Factors  
22 affecting uptake of  $\geq 3$  doses of Sulfadoxine-Pyrimethamine for malaria prevention in  
23 pregnancy in selected health facilities, Arusha region, Tanzania. *BMC Pregnancy Childbirth*,  
24 2019; 440 <https://doi.org/10.1186/s12884-019-2592-0>  
25  
26  
27  
28  
29 32. Gross, K., Alba, S., Glass, T.R. et al. Timing of antenatal care for adolescent and adult  
30 pregnant women in south-eastern Tanzania. *BMC Pregnancy Childbirth* 2012; 16.  
31 <https://doi.org/10.1186/1471-2393-12-16>  
32  
33  
34  
35 33. Mutanyi JA, Onguru DO, Ogolla SO, Adipo LB. Determinants of the uptake of intermittent  
36 preventive treatment of malaria in pregnancy with sulphadoxine pyrimethamine in Sabatia Sub  
37 County, Western Kenya. *Infect Dis Poverty*. 2021;10:106.  
38  
39  
40  
41 34. Darteh EKM, Dickson KS, Ahinkorah BO, Owusu BA, Okyere J, Salihu T et al. Factors influencing  
42 the uptake of intermittent preventive treatment among pregnant women in sub-Saharan Africa: a  
43 multilevel analysis. *Arch Public Health*. 2021;79(1):182. doi: 10.1186/s13690-021-00707-z.  
44  
45  
46  
47 35. Burger R. School effectiveness in Zambia: The origins of differences between rural and urban  
48 outcomes. *Dev South Afr*. 2011 Jun 1;28:157–76.  
49  
50  
51 36. Mbengue MAS, Bei AK, Mboup A, Ahouidi A, Sarr M, Mboup S, et al. Factors influencing the use  
52 of malaria prevention strategies by women in Senegal: a cross-sectional study. *Malar J*. 2017;  
53 16:470.  
54  
55  
56  
57  
58  
59  
60

- 1  
2  
3 37. Ayiisi EA. Knowledge and Utilization of Intermittent Preventive Treatment (IPT) for Malaria  
4 Control Among Pregnant Women Attending Antenatal Clinics in the Sunyani West District of  
5 Ghana. *Sci J Public Health*. 2017; 5(3):254.  
6  
7  
8  
9 38. Odjidja EN, Kwanin C, Saha M. Low Uptake of Intermittent Preventive Treatment in Ghana; An  
10 Examination of Health System Bottlenecks. *Health Syst Policy Res*. 4(3):0–0.  
11  
12  
13 39. Dun-Dery F, Meissner P, Beiersmann C, Kuunibe N, Winkler V, Albrecht J, Müller O. Uptake  
14 challenges of intermittent preventive malaria therapy among pregnant women and their health  
15 care providers in the Upper West Region of Ghana: A mixed-methods study. *Parasite Epidemiol*  
16 *Control*;15:e00222. doi: 10.1016/j.parepi.2021.e00222.  
17  
18  
19 40. Blystad A, Moland KM, Munsaka E, Sandøy I, Zulu J. Vanilla biscuits and lobola bride wealth:  
20 parallel discourses on early pregnancy and schooling in rural Zambia. *BMC Public Health*.  
21 2020;20(1):1485.  
22  
23  
24  
25  
26  
27 41. Massar, K., Sialubanje, C., Maltagliati, I., & Ruiter, R. A. C. (2018). Exploring the perceived  
28 effectiveness of applied theater as a maternal health promotion tool in rural Zambia. *Qualitative*  
29 *Health Research*, 28(12), 1933–1943. <https://doi.org/10.1177/1049732318794207>  
30  
31  
32  
33  
34 42. Sialubanje C, Sitali DC, Mukumbuta N, Liyali L, Sumbwa PI, Kamboyi HK et al. Perspectives on  
35 factors influencing transmission of COVID-19 in Zambia: a qualitative study of health workers  
36 and community members. *BMJ Open* 2022;12:e057589. doi: 10.1136/bmjopen-2021-057589  
37  
38  
39  
40  
41 43. Sialubanje C, Mukumbuta N, Ng'andu M, Sumani EM, Nkonkomalimba M, Lyatumba DEM et al.  
42 Perspectives on the COVID-19 vaccine uptake: a qualitative study of community members and  
43 health workers in Zambia. *BMJ Open* 2022;12:e058028. doi: 10.1136/bmjopen-2021-058028  
44  
45  
46  
47  
48 44. Sialubanje C, Kaiser JL, Ngoma T, Mwananyanda L, Fong RM, Hamer DH, Scott NA. Postnatal  
49 care services in rural Zambia: a qualitative exploration of user, provider, and community  
50 perspectives on quality of care. *BMC pregnancy and childbirth*. 2023;23(1):39.  
51  
52  
53  
54  
55  
56  
57  
58  
59  
60

1  
2  
3  
4  
5  
6  
7  
8  
9  
10  
11  
12  
13  
14  
15  
16  
17  
18  
19  
20  
21  
22  
23  
24  
25  
26  
27  
28  
29  
30  
31  
32  
33  
34  
35  
36  
37  
38  
39  
40  
41  
42  
43  
44  
45  
46  
47  
48  
49  
50  
51  
52  
53  
54  
55  
56  
57  
58  
59  
60

For peer review only

1  
2  
3 **Figure 1: Participant recruitment algorithm**  
4  
5  
6

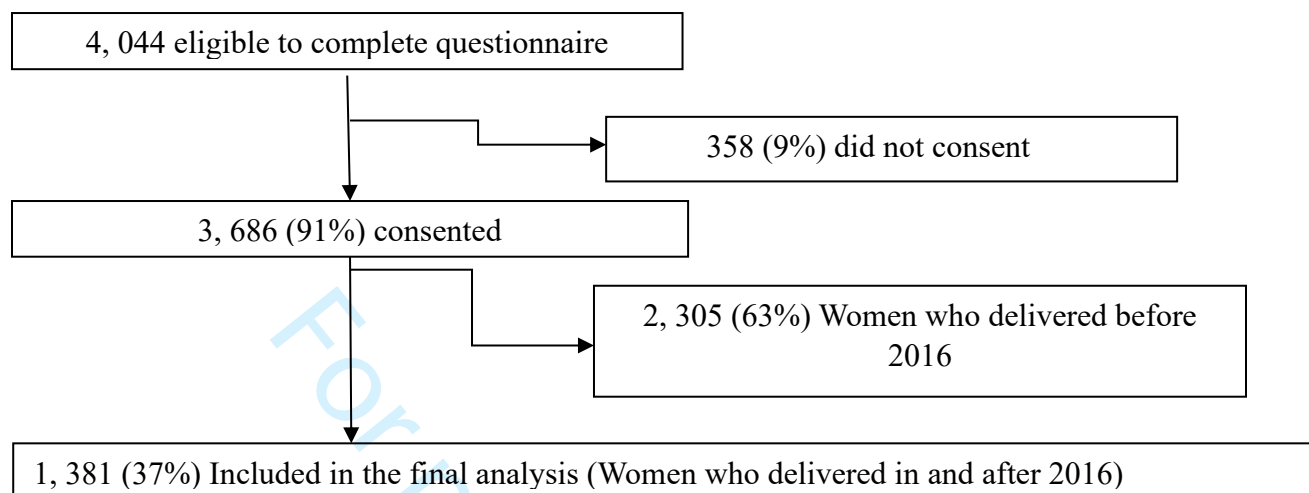

**STROBE Statement—Checklist of items that should be included in reports of descriptive studies**

| Item                           | Recommendation                                                                                                                                                                                                                                                                                     | Page |
|--------------------------------|----------------------------------------------------------------------------------------------------------------------------------------------------------------------------------------------------------------------------------------------------------------------------------------------------|------|
| Title and abstract             | Indicate the study's design with a commonly used term in the title or the abstract                                                                                                                                                                                                                 | 1    |
|                                | Provide in the abstract an informative and balanced summary of what was done and what was found                                                                                                                                                                                                    | 2    |
| Introduction                   |                                                                                                                                                                                                                                                                                                    |      |
| Background/rationale           | Explain the scientific background and rationale for the investigation being reported                                                                                                                                                                                                               | 4    |
| Objectives                     | State specific objectives, including any pre-specified hypotheses                                                                                                                                                                                                                                  | 5    |
| Methods                        |                                                                                                                                                                                                                                                                                                    |      |
| Study design                   | Present key elements of study design early in the paper                                                                                                                                                                                                                                            | 5    |
| Setting                        | Describe the setting, locations, and relevant dates, including periods of recruitment, exposure, follow-up, and data collection                                                                                                                                                                    | 6    |
| Participants                   | Give the eligibility criteria, and the sources and methods of selection of participants. Describe methods of follow-up                                                                                                                                                                             | 6    |
| Study size                     | Explain how the study size was arrived at                                                                                                                                                                                                                                                          | 7    |
| Variables                      | Clearly define all outcomes, exposures, predictors, potential confounders, and effect modifiers. Give diagnostic criteria, if applicable                                                                                                                                                           | 7    |
| Data sources/ measurement      | For each variable of interest, give sources of data and details of methods of assessment (measurement). Describe comparability of assessment methods if there is more than one group                                                                                                               | 8    |
|                                |                                                                                                                                                                                                                                                                                                    |      |
| Statistical methods            | Describe all statistical methods, including those used to control for confounding                                                                                                                                                                                                                  | 8    |
|                                | If applicable, explain how loss to follow-up was addressed                                                                                                                                                                                                                                         |      |
| Patient and public involvement |                                                                                                                                                                                                                                                                                                    | 8    |
| Results                        |                                                                                                                                                                                                                                                                                                    |      |
| Participants                   | Report numbers of individuals at each stage of study—eg numbers potentially eligible, examined for eligibility, confirmed eligible, included in the study, completing follow-up, and analysed (b) Give reasons for non-participation at each stage Participants (c) Consider use of a flow diagram | 9    |
| Descriptive statistics         | (a) Give characteristics of study participants (eg demographic, clinical, social) and information on exposures and potential confounders<br>Descriptive data<br>(b) Indicate number of participants with missing data for each variable of interest                                                | 9    |
| Main results                   |                                                                                                                                                                                                                                                                                                    | 10   |
| Discussion                     |                                                                                                                                                                                                                                                                                                    | 14   |

|    |             |    |
|----|-------------|----|
| 1  |             |    |
| 2  |             |    |
| 3  | Limitations | 16 |
| 4  | Conclusion  | 17 |
| 5  | References  | 18 |
| 6  |             |    |
| 7  |             |    |
| 8  |             |    |
| 9  |             |    |
| 10 |             |    |
| 11 |             |    |
| 12 |             |    |
| 13 |             |    |
| 14 |             |    |
| 15 |             |    |
| 16 |             |    |
| 17 |             |    |
| 18 |             |    |
| 19 |             |    |
| 20 |             |    |
| 21 |             |    |
| 22 |             |    |
| 23 |             |    |
| 24 |             |    |
| 25 |             |    |
| 26 |             |    |
| 27 |             |    |
| 28 |             |    |
| 29 |             |    |
| 30 |             |    |
| 31 |             |    |
| 32 |             |    |
| 33 |             |    |
| 34 |             |    |
| 35 |             |    |
| 36 |             |    |
| 37 |             |    |
| 38 |             |    |
| 39 |             |    |
| 40 |             |    |
| 41 |             |    |
| 42 |             |    |
| 43 |             |    |
| 44 |             |    |
| 45 |             |    |
| 46 |             |    |
| 47 |             |    |
| 48 |             |    |
| 49 |             |    |
| 50 |             |    |
| 51 |             |    |
| 52 |             |    |
| 53 |             |    |
| 54 |             |    |
| 55 |             |    |
| 56 |             |    |
| 57 |             |    |
| 58 |             |    |
| 59 |             |    |
| 60 |             |    |

For peer review only
