# Supplementary figures and images for: Uptake of four or more doses of sulfadoxine pyrimethamine for intermittent preventive treatment of malaria during pregnancy in Zambia: findings from the 2018 malaria in pregnancy survey
Source: PubMed Central journal article supplement — BMJ Open. 2023 May 26;13(5):e073287. doi: 10.1136/bmjopen-2023-073287 (PMC10231002; doi:10.1136/bmjopen-2023-073287), 2023-05-26

**Figure 1: Participant recruitment algorithm**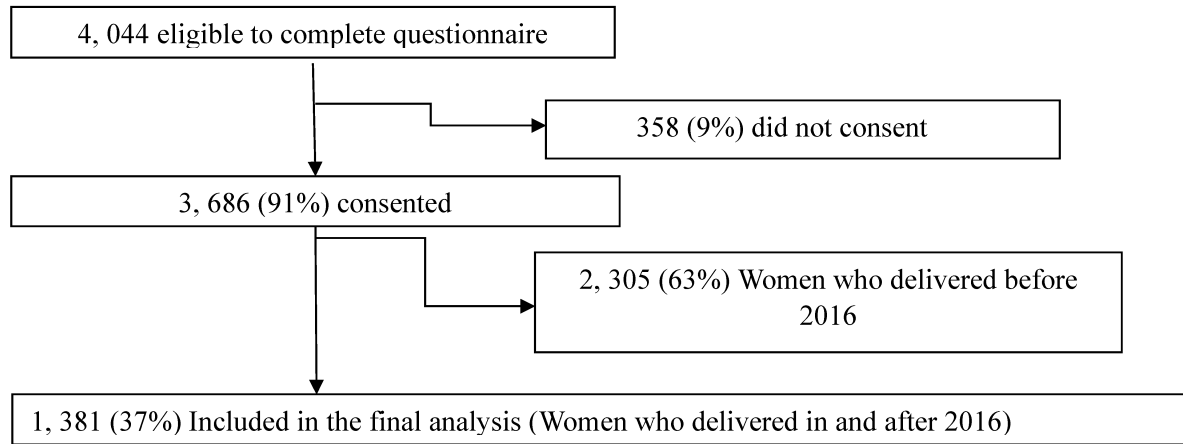

Supplement: bmjopen-2023-073287supp001.pdf [file bmjopen-2023-073287supp001.pdf]
